# Supplementary material for: A new ESI-LC/MS approach for comprehensive metabolic profiling of phytocannabinoids in Cannabis
Source: Springer Nature journal article supplement (doi:10.1038/s41598-018-32651-4), 2018-09-18
Supplement: MOESM1 [file 41598_2018_32651_MOESM1_ESM.pdf]

# Supporting Information for Publication

A new ESI-LC/MS approach for comprehensive metabolic profiling of phytocannabinoids in *Cannabis*

*Paula Berman<sup>a</sup>, Kate Futoran<sup>a</sup>, Gil M Lewitus<sup>a</sup>, Dzmitry Mukha<sup>a</sup>, Maya Benami<sup>a</sup>, Tomer Shlomi<sup>a,b</sup>, and David Meiri<sup>a,\*</sup>*

<sup>a</sup>Department of Biology, Technion-Israel Institute of Technology, Haifa 320003, Israel; <sup>b</sup>Department of Computer Science, Technion-Israel Institute of Technology, Haifa 320003, Israel.

\*Corresponding author: Tel/fax: +972-77-8871680; Email: [dmeiri@technion.ac.il](mailto:dmeiri@technion.ac.il)

# Table of contents

## List of Supplementary Figures

|                                                                                                                                                                                            |           |
|--------------------------------------------------------------------------------------------------------------------------------------------------------------------------------------------|-----------|
| <b>Figure S1.</b> General overview of work methodology.....                                                                                                                                | S-1       |
| <b>Figure S2.</b> Plots of the LC/MS/MS ion abundance of the deprotonated molecular and product ions as a function of NCE energy for the available neutral phytocannabinoid standards..... | S-2       |
| <b>Figure S3.</b> MS/MS spectral library of CBG-type phytocannabinoids.....                                                                                                                | S-3       |
| <b>Figure S4.</b> MS/MS spectral library of $\Delta^9$ -THC-type phytocannabinoids.....                                                                                                    | S-4       |
| <b>Figure S5.</b> MS/MS spectral library of CBD-type phytocannabinoids.....                                                                                                                | S-5       |
| <b>Figure S6.</b> MS/MS spectral library of CBC-type phytocannabinoids.....                                                                                                                | S-6       |
| <b>Figure S7.</b> MS/MS spectral library of CBN-type phytocannabinoids.....                                                                                                                | S-7       |
| <b>Figure S8.</b> MS/MS spectral library of $\Delta^8$ -THC phytocannabinoid.....                                                                                                          | S-8       |
| <b>Figure S9.</b> MS/MS spectral library of CBL phytocannabinoid.....                                                                                                                      | S-9       |
| <b>Figure S10.</b> MS/MS spectral library of CBND-type phytocannabinoids.....                                                                                                              | S-10      |
| <b>Figure S11.</b> MS/MS spectral library of CBE-type phytocannabinoids.....                                                                                                               | S-11      |
| <b>Figure S12.</b> MS/MS spectral library of CBT-type phytocannabinoids.....                                                                                                               | S-12      |
| <b>Figure S13.</b> MS/MS spectral library of additional phytocannabinoids (Parts I-IV).....                                                                                                | S-13-S-16 |
| <b>Figure S14.</b> Data analysis methods for exploring variations of phytocannabinoids for the 36 <i>Cannabis</i> samples.....                                                             | S-17      |

## List of Supplementary Tables

|                                                                                                                        |           |
|------------------------------------------------------------------------------------------------------------------------|-----------|
| <b>Table S1.</b> List of neutral and acid potential masses of phytocannabinoids used in data dependent MS/MS mode..... | S-18-S-23 |
| <b>Table S2.</b> Validation of the external calibration curves for the available 13 phytocannabinoids.....             | S-24      |
| <b>Table S3.</b> Ranges of absolute phytocannabinoid contents for the 36 <i>Cannabis</i> samples.....                  | S-25-S-28 |

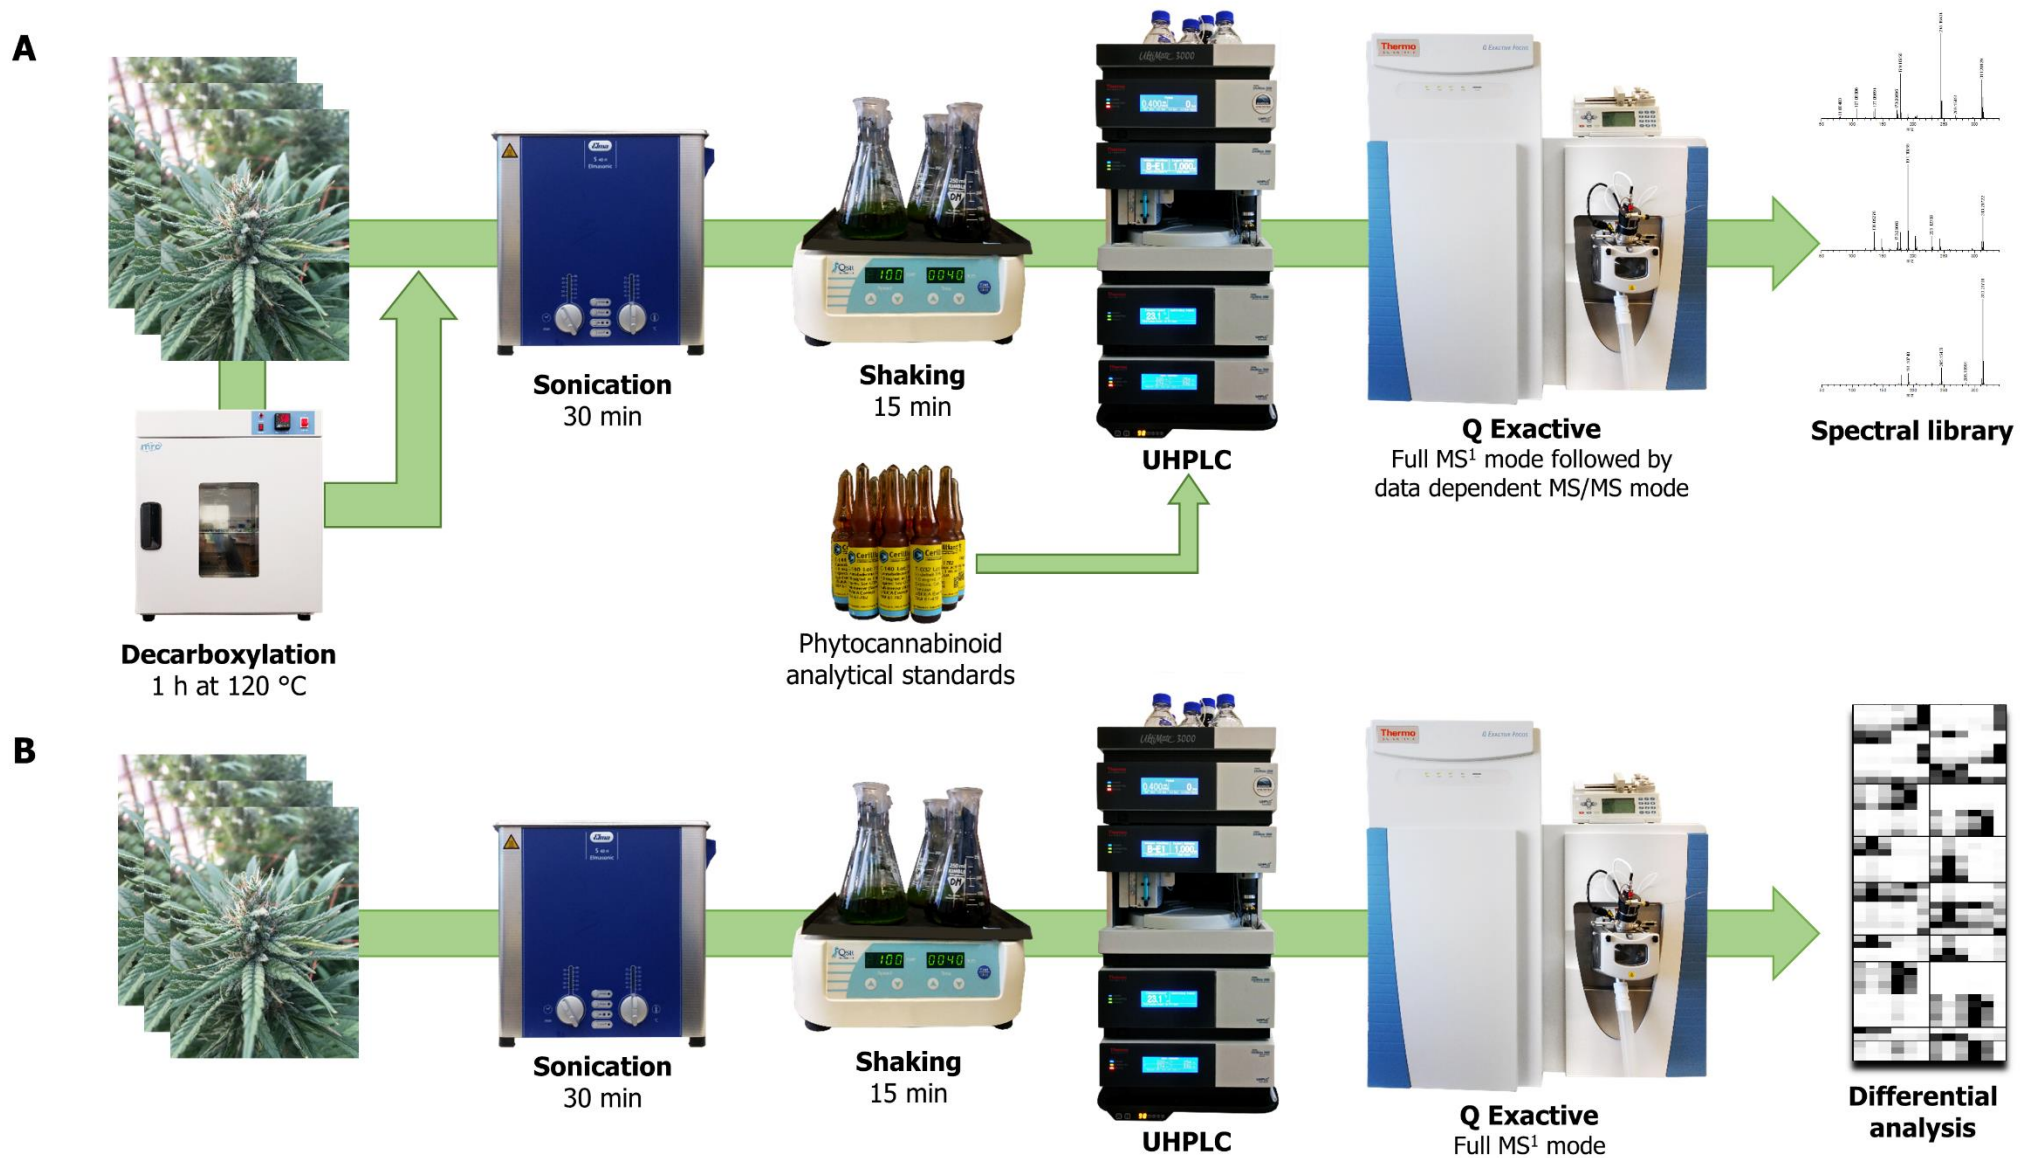

**Figure S1. General overview of work methodology.** (A) In the identification process, phytocannabinoids were chromatographically separated by reversed phase ultra HPLC (RP-UHPLC) and detected via MS/MS analysis. (B) Differential profiling of numerous medical *Cannabis* strains was performed by LC/MS according to the retention times and accurate masses of the identified phytocannabinoids in the spectral MS/MS library.

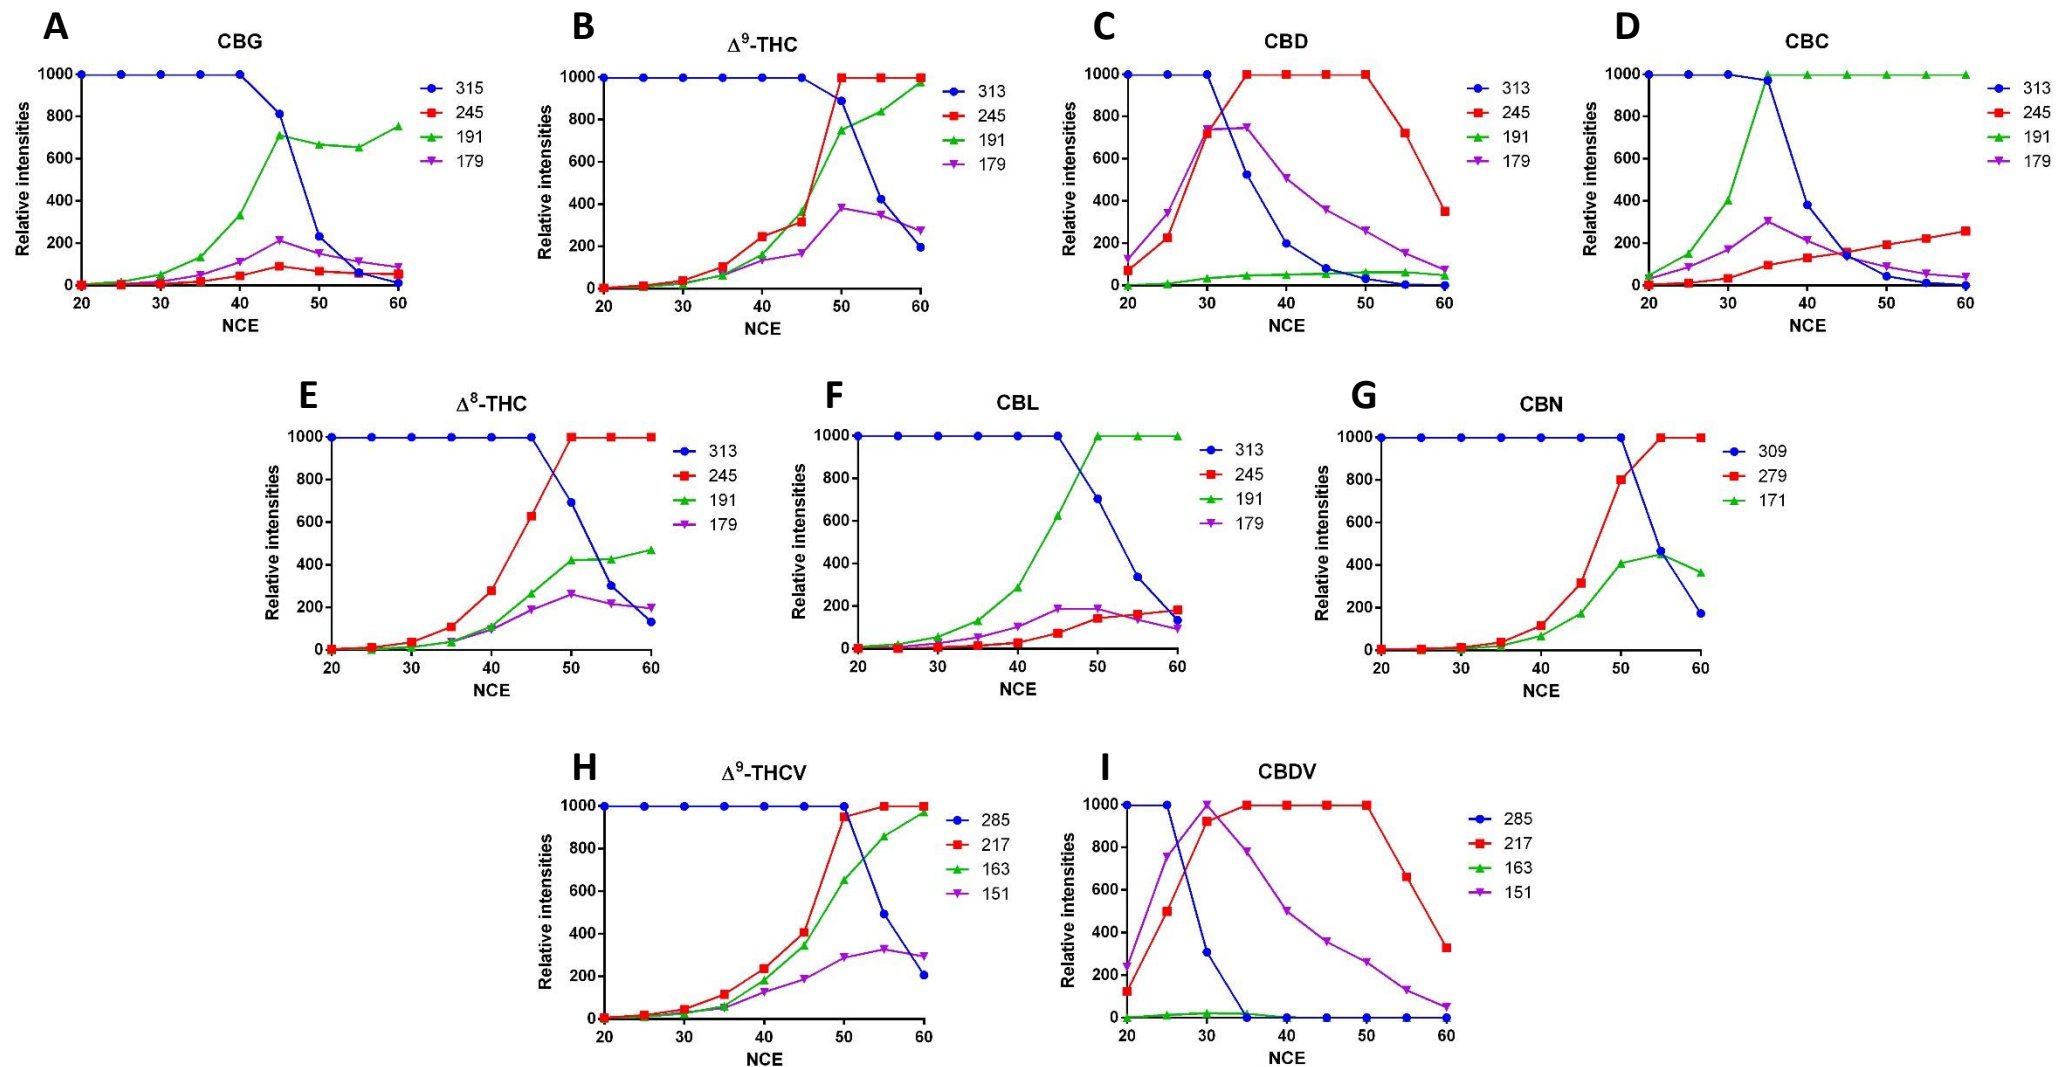

**Figure S2. Plots of the LC/MS/MS ion abundance of the deprotonated precursor and product ions as a function of NCE energy for the available neutral pentyl and propyl phytocannabinoid standards.** (A) CBG, (B)  $\Delta^9$ -THC, (C) CBD, (D) CBC, (E)  $\Delta^8$ -THC, (F) CBL, (G) CBN, (H)  $\Delta^9$ -THCV, and (I) CBDV. Accurate masses according to high-resolution LC/MS in descending order are as follows: 315.2329, 313.2173, 309.1860, 285.1860, 279.1391, 245.1547, 217.1234, 191.1078, 179.1078, 171.0815, 163.0765 and 151.0765.

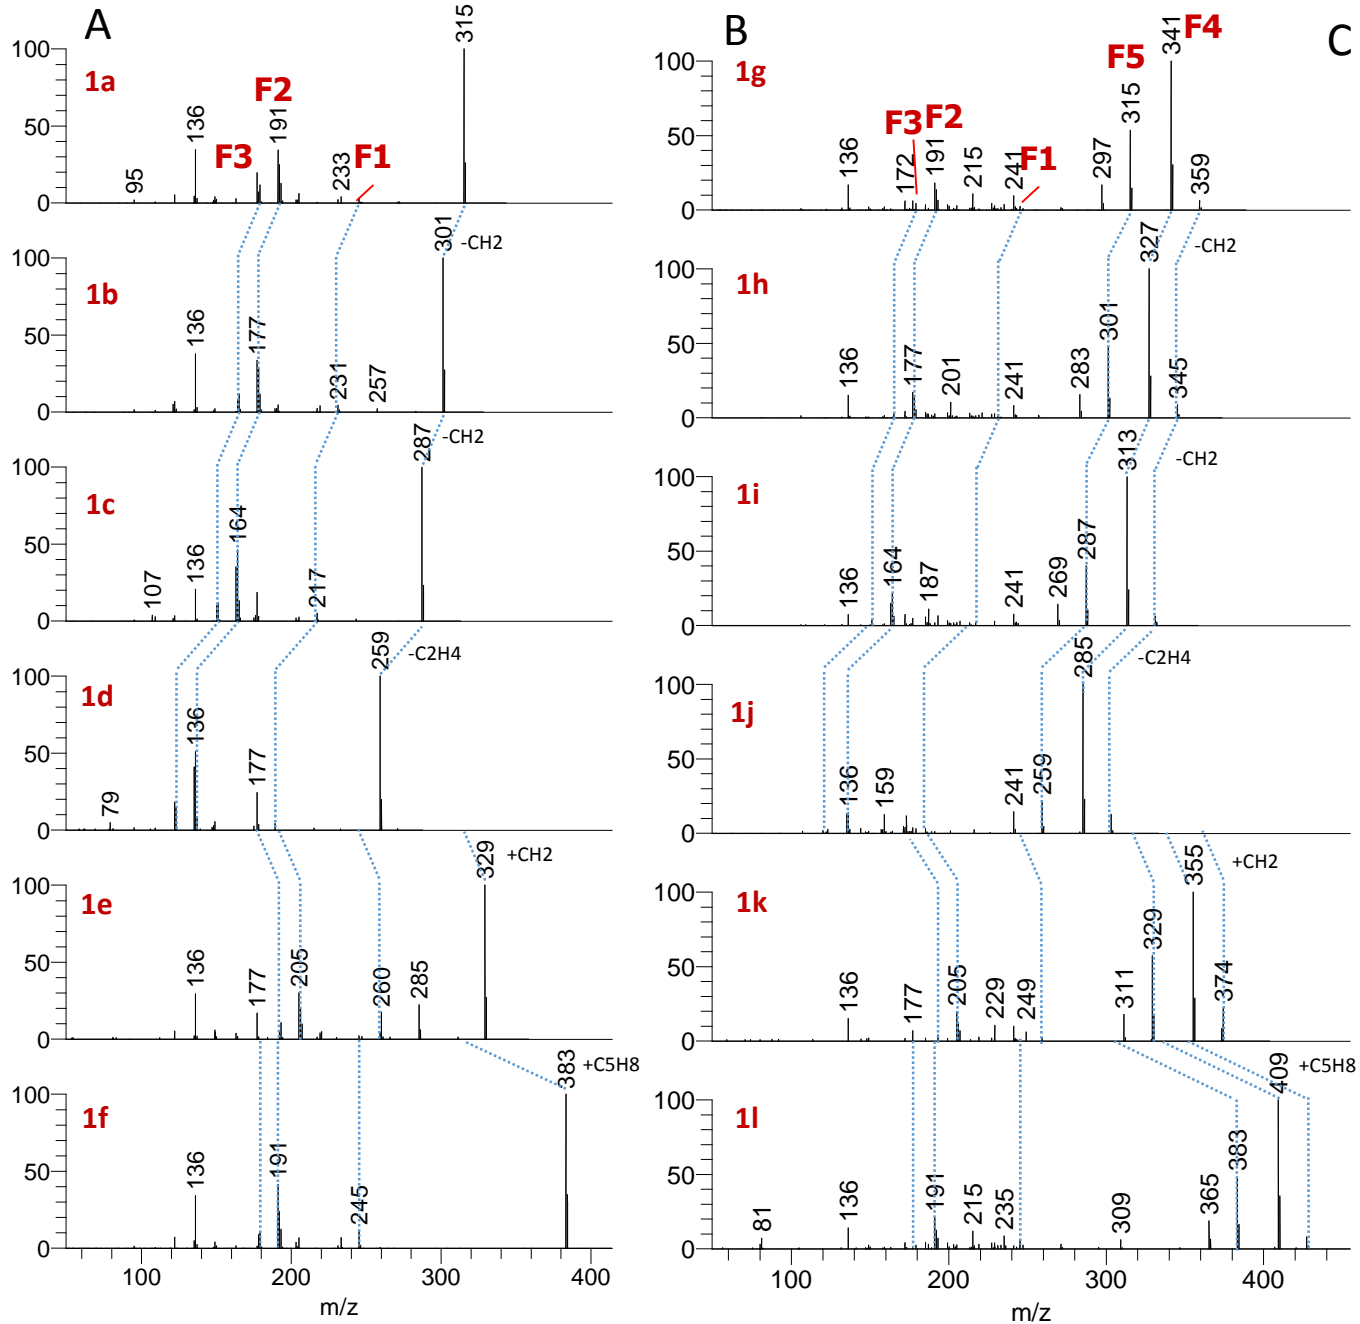

**Figure S3. MS/MS spectral library of CBG-type phytocannabinoids.** MS/MS spectra of the identified CBG type (A) neutral and (B) acid phytocannabinoids, (C) names, retention times and accurate masses, and (D) their fragmentation structures. Values of  $m/z$  in (A) and (B) are presented as nominal masses to improve interpretation of spectra. Accurate masses for the main fragments appear in (C).

C

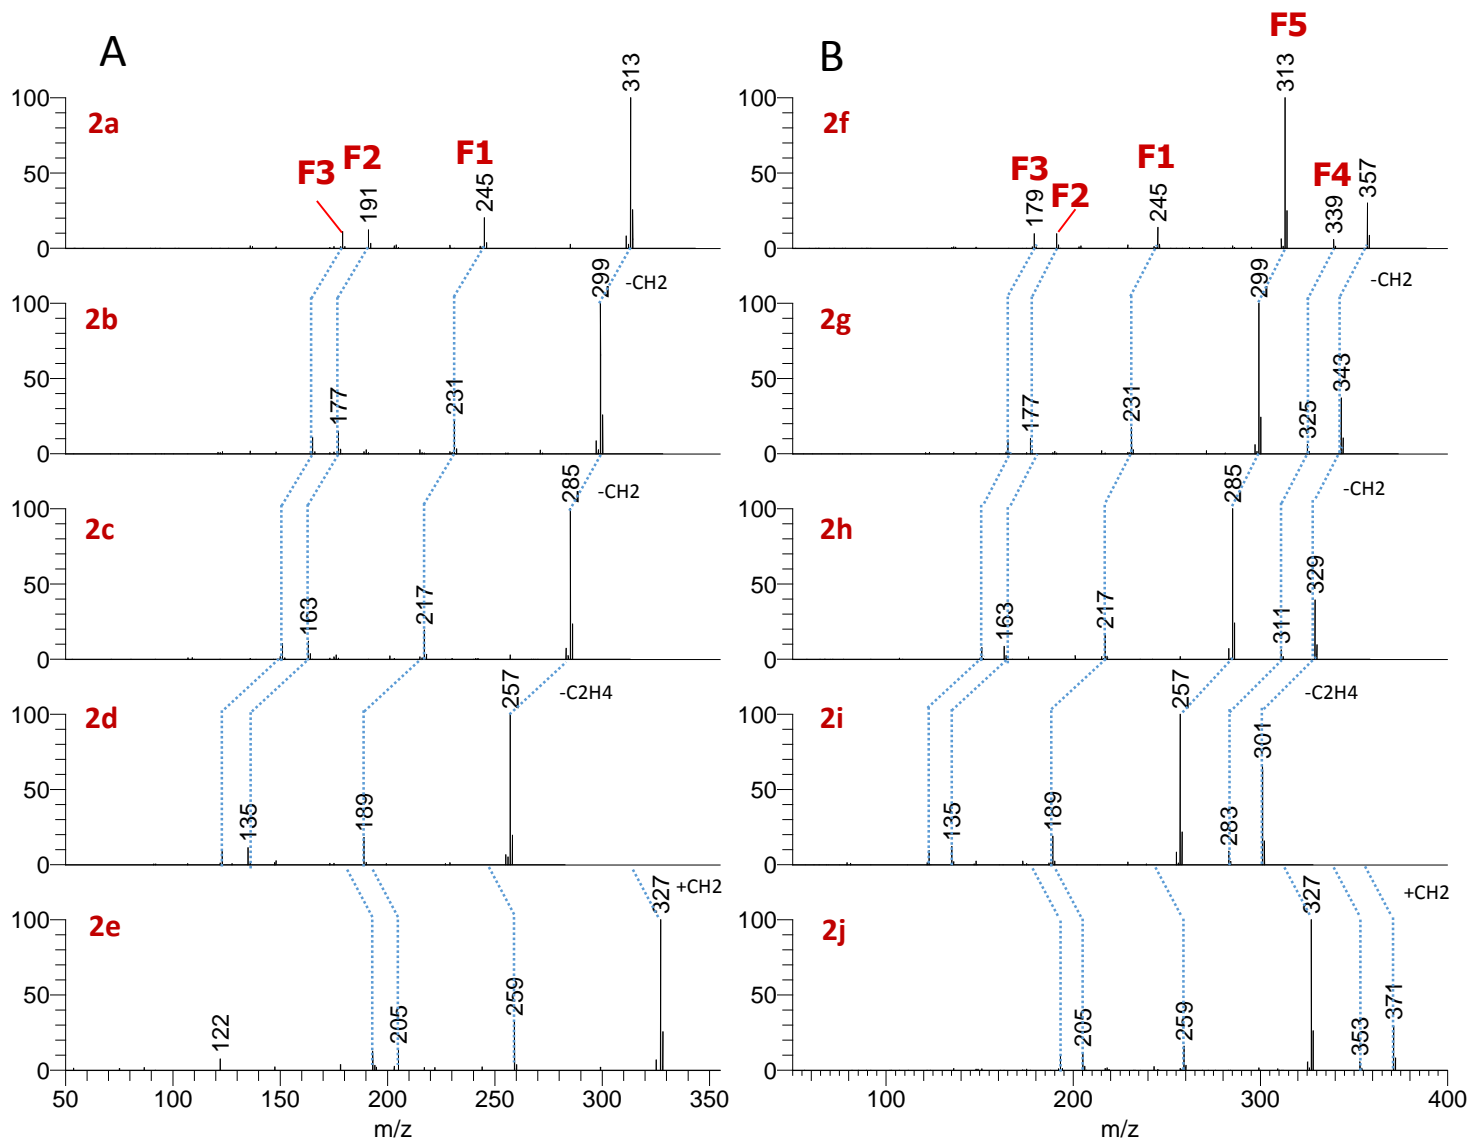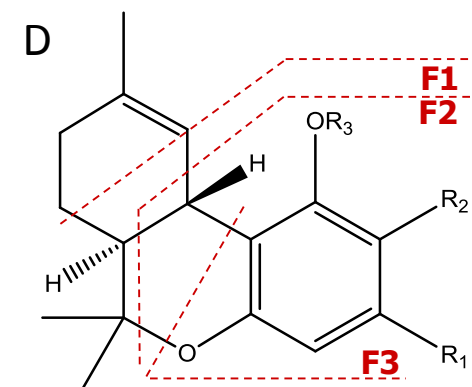

**Figure S4. MS/MS spectral library of  $\Delta^9$ -THC-type phytocannabinoids.** MS/MS spectra of the identified  $\Delta^9$ -THC type (**A**) neutral and (**B**) acid phytocannabinoids, (**C**) names, retention times and accurate masses, and (**D**) their fragmentation structures. Values of  $m/z$  in (**A**) and (**B**) are presented as nominal masses to improve interpretation of spectra. Accurate masses for the main fragments appear in (**C**).

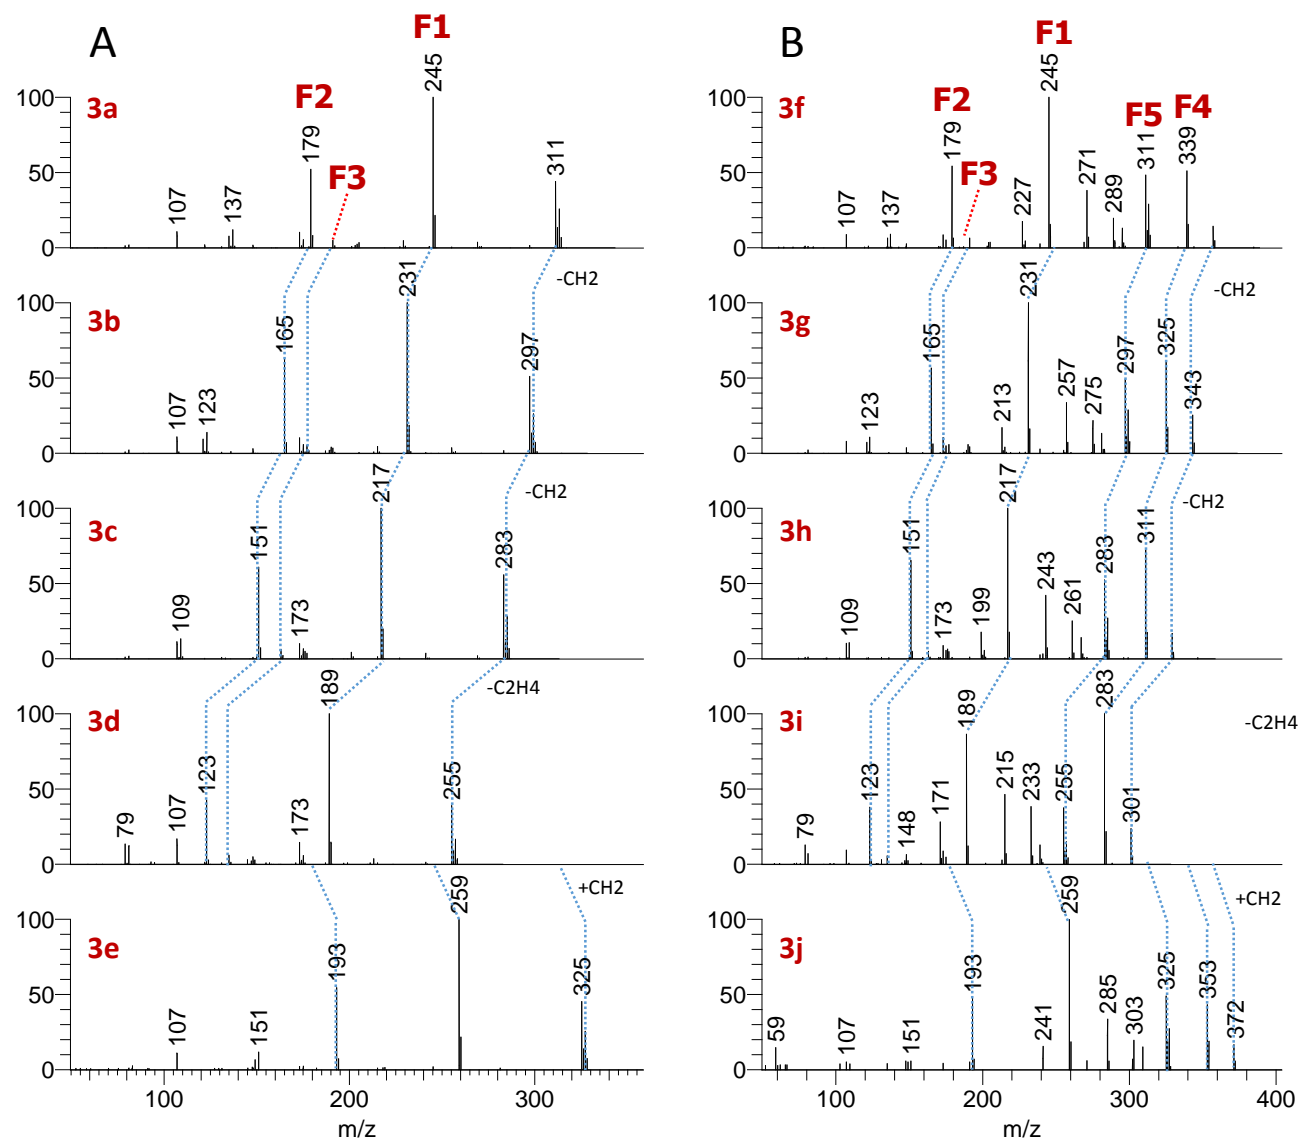

**C**

|           | Name                 | R1    | R2   | R3  | RT [min] | [M-H]-   | [MF1-H]- | [MF2-H]- | [MF3-H]- | [MF4-H]- | [MF5-H]- |
|-----------|----------------------|-------|------|-----|----------|----------|----------|----------|----------|----------|----------|
| <b>3a</b> | CBD <sup>a</sup>     | C5H11 | H    | H   | 7.96     | 313.2173 | 245.1547 | 191.1078 | 179.1067 | -        | -        |
|           |                      |       |      |     |          | C21H29O2 | C16H21O2 | C12H15O2 | C11H15O2 |          |          |
| <b>3b</b> | CBD-C4               | C4H9  | H    | H   | 6.74     | 299.2017 | 231.1391 | 177.0921 | 165.0921 | -        | -        |
|           |                      |       |      |     |          | C20H27O2 | C15H19O2 | C11H13O2 | C10H13O2 |          |          |
| <b>3c</b> | CBDV <sup>a</sup>    | C3H7  | H    | H   | 5.86     | 285.1860 | 217.1234 | 163.0765 | 151.0765 | -        | -        |
|           |                      |       |      |     |          | C19H25O2 | C14H17O2 | C10H11O2 | C9H11O2  |          |          |
| <b>3d</b> | CBDO                 | CH3   | H    | H   | 4.61     | 257.1547 | 189.0921 | 135.0452 | 123.0452 | -        | -        |
| <b>3e</b> | CBDM                 | C5H11 | H    | CH3 | 10.7     | 327.2329 | 259.1704 | 205.1234 | 193.1234 | -        | -        |
|           |                      |       |      |     |          | C22H31O2 | C17H23O2 | C13H17O2 | C12H17O2 |          |          |
| <b>3f</b> | CBDA <sup>a</sup>    | C5H11 | COOH | H   | 7.67     | 357.2071 | 245.1547 | 191.1078 | 179.1067 | 339.1966 | 313.2173 |
|           |                      |       |      |     |          | C22H29O4 | C16H21O2 | C12H15O2 | C11H15O2 | C22H27O3 | C21H29O2 |
| <b>3g</b> | CBDA-C4 <sup>b</sup> | C4H9  | COOH | H   | 6.64     | 343.1915 | 231.1391 | 177.0921 | 165.0921 | 325.1809 | 299.2017 |
|           |                      |       |      |     |          | C21H27O4 | C15H19O2 | C11H13O2 | C10H13O2 | C21H25O3 | C20H27O2 |
| <b>3h</b> | CBDVA <sup>a</sup>   | C3H7  | COOH | H   | 5.90     | 329.1758 | 217.1234 | 163.0765 | 151.0765 | 311.1653 | 285.1860 |
|           |                      |       |      |     |          | C20H25O4 | C14H17O2 | C10H11O2 | C9H11O2  | C20H23O3 | C19H25O2 |
| <b>3i</b> | CBDOA <sup>b</sup>   | CH3   | COOH | H   | 4.92     | 301.1445 | 189.0921 | 135.0452 | 123.0452 | 283.1340 | 257.1547 |
|           |                      |       |      |     |          | C18H21O4 | C12H13O2 | C8H7O2   | C7H7O2   | C18H19O3 | C17H21O2 |
| <b>3j</b> | CBDMA <sup>b</sup>   | C5H11 | COOH | CH3 | 9.16     | 371.2228 | 259.1704 | 205.1234 | 193.1234 | 353.2122 | 327.2329 |
|           |                      |       |      |     |          | C23H31O4 | C17H23O2 | C13H17O2 | C12H17O2 | C23H29O3 | C22H31O2 |

<sup>a</sup>Analytical standard

<sup>b</sup>Non-isolated and identified phytocannabinoid in the literature

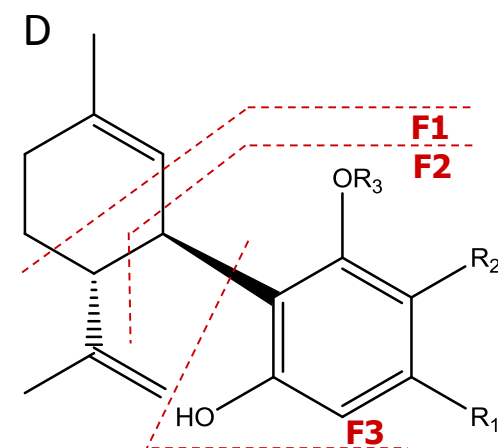

**Figure S5. MS/MS spectral library of CBD-type phytocannabinoids.** MS/MS spectra of the identified CBD type (**A**) neutral and (**B**) acid phytocannabinoids, (**C**) names, retention times and accurate masses, and (**D**) their fragmentation structures. Values of  $m/z$  in (**A**) and (**B**) are presented as nominal masses to improve interpretation of spectra. Accurate masses for the main fragments appear in (**C**).

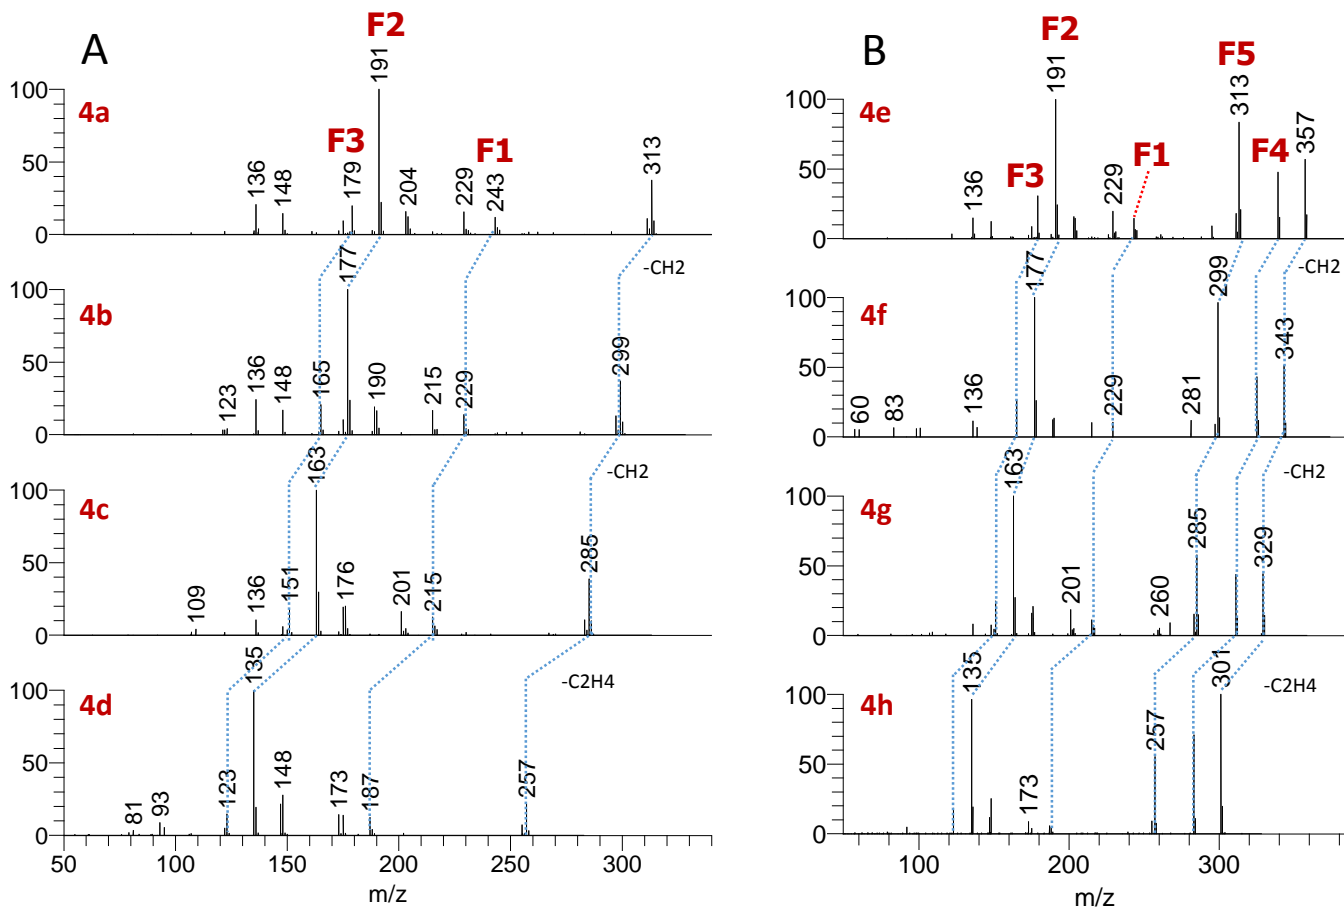

**C**

|           | Name                 | R1    | R2   | RT [min] | [M-H]-   | [MF1-H]- | [MF2-H]- | [MF3-H]- | [MF4-H]- | [MF5-H]- |
|-----------|----------------------|-------|------|----------|----------|----------|----------|----------|----------|----------|
| <b>4a</b> | CBC <sup>a</sup>     | C5H11 | H    | 12.08    | 313.2173 | 243.1391 | 191.1078 | 179.1067 | -        | -        |
|           |                      |       |      |          | C21H29O2 | C16H19O2 | C12H15O2 | C11H15O2 |          |          |
| <b>4b</b> | CBC-C4 <sup>b</sup>  | C4H9  | H    | 11.05    | 299.2017 | 229.1234 | 177.0921 | 165.0921 | -        | -        |
|           |                      |       |      |          | C20H27O2 | C15H17O2 | C11H13O2 | C10H13O2 |          |          |
| <b>4c</b> | CBCV                 | C3H7  | H    | 9.64     | 285.1860 | 215.1078 | 163.0765 | 151.0765 | -        | -        |
|           |                      |       |      |          | C19H25O2 | C14H15O2 | C10H11O2 | C9H11O2  |          |          |
| <b>4d</b> | CBCO                 | CH3   | H    | 6.82     | 257.1547 | 187.0765 | 135.0452 | 123.0452 | -        | -        |
| <b>4e</b> | CBCA                 | C5H11 | COOH | 13.23    | 357.2071 | 243.1391 | 191.1078 | 179.1067 | 339.1966 | 313.2173 |
|           |                      |       |      |          | C22H29O4 | C16H19O4 | C12H15O4 | C11H15O4 | C22H27O3 | C21H29O2 |
| <b>4f</b> | CBCA-C4 <sup>b</sup> | C4H9  | COOH | 12.43    | 343.1915 | 229.1234 | 177.0921 | 165.0921 | 325.1809 | 299.2017 |
|           |                      |       |      |          | C21H27O4 | C15H17O4 | C11H13O4 | C10H13O4 | C21H25O3 | C20H27O2 |
| <b>4g</b> | CBCVA                | C3H7  | COOH | 11.48    | 329.1758 | 215.1078 | 163.0765 | 151.0765 | 311.1653 | 285.1860 |
|           |                      |       |      |          | C20H25O4 | C14H15O4 | C10H11O4 | C9H11O4  | C20H23O3 | C19H25O2 |
| <b>4h</b> | CBCOA                | CH3   | COOH | 9.36     | 301.1445 | 187.0765 | 135.0452 | 123.0452 | 283.1340 | 257.1547 |
|           |                      |       |      |          | C18H21O4 | C12H11O4 | C8H7O4   | C7H7O4   | C18H19O3 | C17H21O2 |

<sup>a</sup>Analytical standard

<sup>b</sup>Non-isolated and identified phytocannabinoid in the literature

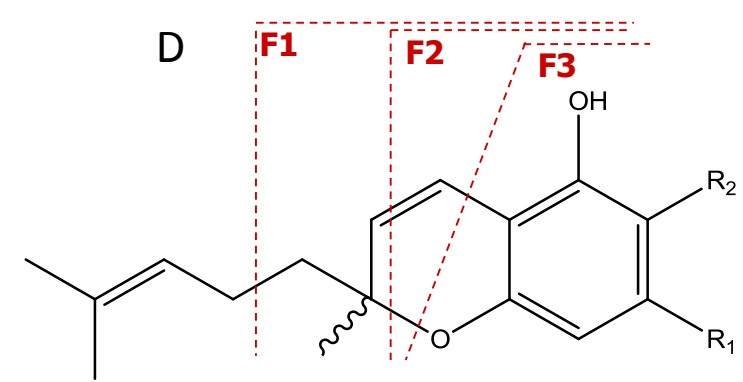

**Figure S6. MS/MS spectral library of CBC-type phytocannabinoids.** MS/MS spectra of the identified CBC type (A) neutral and (B) acid phytocannabinoids, (C) names, retention times and accurate masses, and (D) their fragmentation structures. Values of m/z in (A) and (B) are presented as nominal masses to improve interpretation of spectra. Accurate masses for the main fragments appear in (C).

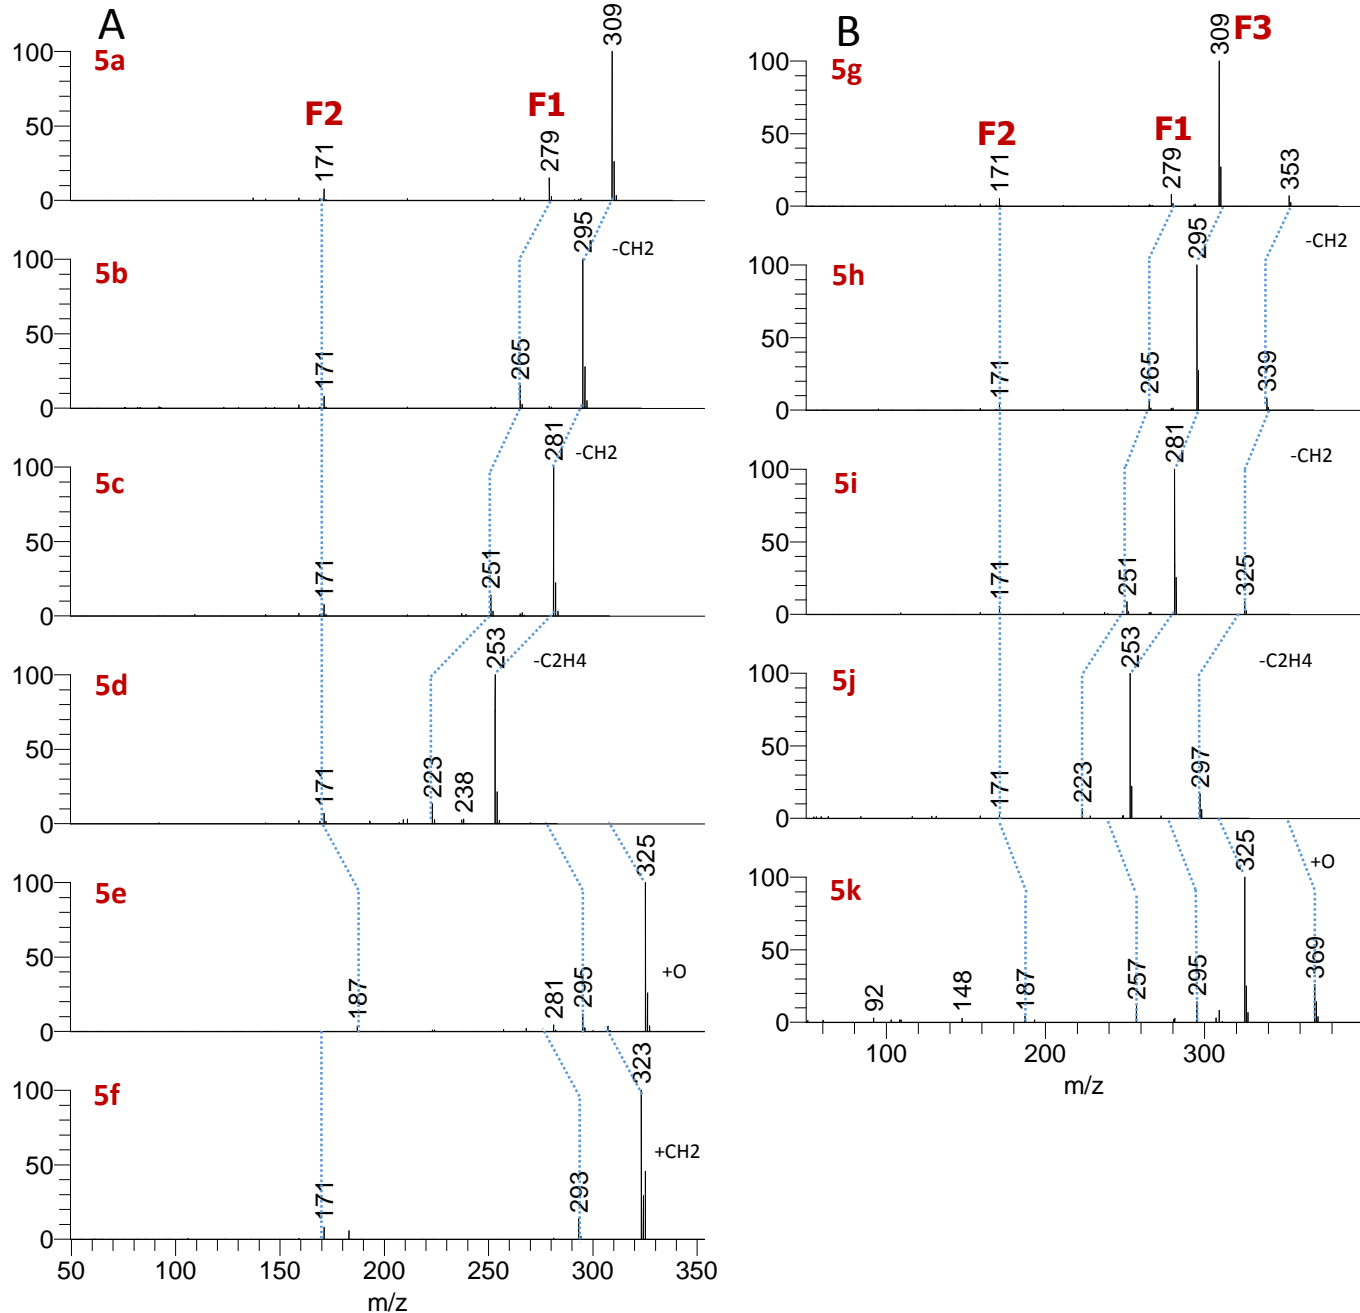

**C**

|           | Name                 | R1    | R2   | R3  | R4 | RT [min] | [M-H]-   | [MF1-H]- | [MF2-H]- | [MF3-H]- |
|-----------|----------------------|-------|------|-----|----|----------|----------|----------|----------|----------|
| <b>5a</b> | CBN <sup>a</sup>     | C5H11 | H    | H   | H  | 10.3     | 309.1860 | 279.1391 | 171.0815 | -        |
|           |                      |       |      |     |    |          | C21H25O2 | C19H19O2 | C12H11O  |          |
| <b>5b</b> | CBN-C4               | C4H9  | H    | H   | H  | 8.57     | 295.1703 | 265.1234 | 171.0815 | -        |
|           |                      |       |      |     |    |          | C20H23O2 | C18H17O2 | C12H11O  |          |
| <b>5c</b> | CBNV                 | C3H7  | H    | H   | H  | 7.08     | 281.1547 | 251.1078 | 171.0815 | -        |
|           |                      |       |      |     |    |          | C19H21O2 | C17H15O2 | C12H11O  |          |
| <b>5d</b> | CBNO                 | CH3   | H    | H   | H  | 5.20     | 253.1234 | 223.0765 | 171.0815 | -        |
|           |                      |       |      |     |    |          | C17H17O2 | C15H11O2 | C12H11O  |          |
| <b>5e</b> | 8-OH-CBN             | C5H11 | H    | H   | OH | 9.34     | 325.1809 | 295.1340 | 187.0765 | -        |
|           |                      |       |      |     |    |          | C21H25O3 | C19H19O3 | C12H11O2 |          |
| <b>5f</b> | CBNM                 | C5H11 | H    | CH3 | H  | 11.55    | 323.2016 | 293.1547 | 171.0815 | -        |
|           |                      |       |      |     |    |          | C21H27O2 | C20H21O2 | C12H11O  |          |
| <b>5g</b> | CBNA                 | C5H11 | COOH | H   | H  | 12.11    | 353.1758 | 279.1391 | 171.0815 | 309.1860 |
|           |                      |       |      |     |    |          | C22H25O4 | C19H19O2 | C12H11O  | C21H25O2 |
| <b>5h</b> | CBNA-C4 <sup>b</sup> | C4H9  | COOH | H   | H  | 11.03    | 339.1602 | 265.1234 | 171.0815 | 295.1703 |
|           |                      |       |      |     |    |          | C21H23O4 | C18H17O2 | C12H11O  | C20H23O2 |
| <b>5i</b> | CBNVA <sup>b</sup>   | C3H7  | COOH | H   | H  | 9.62     | 325.1445 | 251.1078 | 171.0815 | 281.1547 |
|           |                      |       |      |     |    |          | C20H21O4 | C17H15O2 | C12H11O  | C19H21O2 |
| <b>5j</b> | CBNOA <sup>b</sup>   | CH3   | COOH | H   | H  | 7.14     | 297.1132 | 223.0765 | 171.0815 | 253.1234 |
|           |                      |       |      |     |    |          | C18H17O4 | C15H11O2 | C12H11O  | C17H17O2 |
| <b>5k</b> | 8-OH-CBNA            | C5H11 | COOH | H   | OH | 12.06    | 369.1707 | 295.1340 | 187.0765 | 325.1809 |
|           |                      |       |      |     |    |          | C22H25O5 | C19H19O3 | C12H11O2 | C21H25O3 |

<sup>a</sup>Analytical standard

<sup>b</sup>Non-isolated and identified phytocannabinoid in the literature

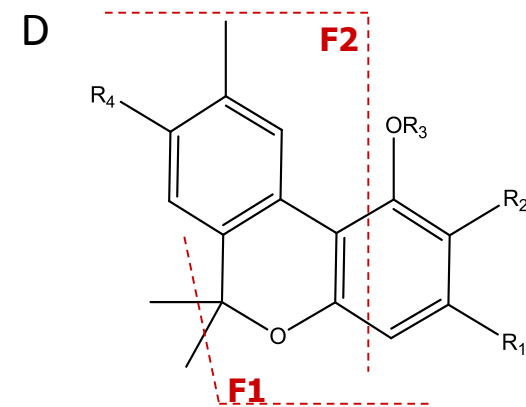

**Figure S7. MS/MS spectral library of CBN-type phytocannabinoids.** MS/MS spectra of the identified CBN type (**A**) neutral and (**B**) acid phytocannabinoids, (**C**) names, retention times and accurate masses, and (**D**) their fragmentation structures. Values of  $m/z$  in (**A**) and (**B**) are presented as nominal masses to improve interpretation of spectra. Accurate masses for the main fragments appear in (**C**).

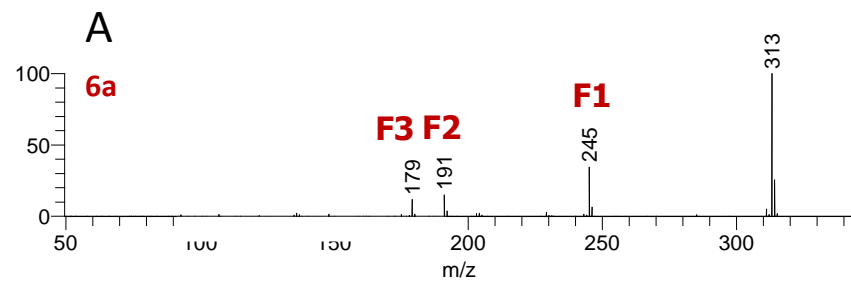

**B**

|           | Name                | RT [min] | [M-H]-                                                     | [MF1-H]-                                                   | [MF2-H]-                                                   | [MF3-H]-                                                   |
|-----------|---------------------|----------|------------------------------------------------------------|------------------------------------------------------------|------------------------------------------------------------|------------------------------------------------------------|
| <b>6a</b> | d8-THC <sup>a</sup> | 11.41    | 313.2173<br>C <sub>21</sub> H <sub>29</sub> O <sub>2</sub> | 245.1547<br>C <sub>16</sub> H <sub>21</sub> O <sub>2</sub> | 191.1078<br>C <sub>12</sub> H <sub>15</sub> O <sub>2</sub> | 179.1067<br>C <sub>11</sub> H <sub>15</sub> O <sub>2</sub> |

<sup>a</sup>Analytical standard

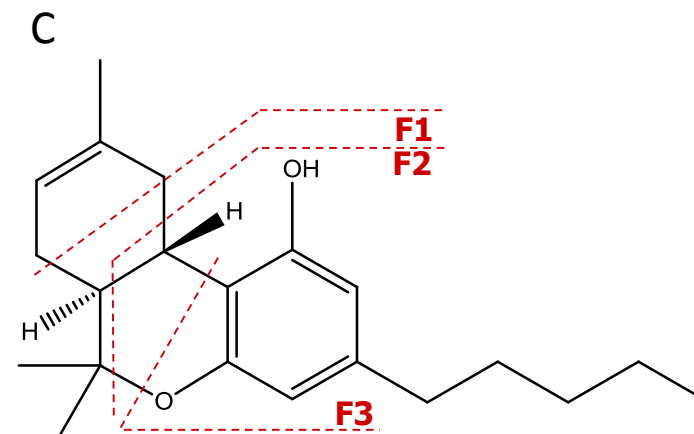

**Figure S8. MS/MS spectral library of  $\Delta^8$ -THC.** (A) MS/MS spectrum of  $\Delta^8$ -THC, (B) name, retention time and accurate mass, and (C) its fragmentation structure. Values of m/z in (A) are presented as nominal masses to improve interpretation of spectra. Accurate masses for the main fragments appear in (B).

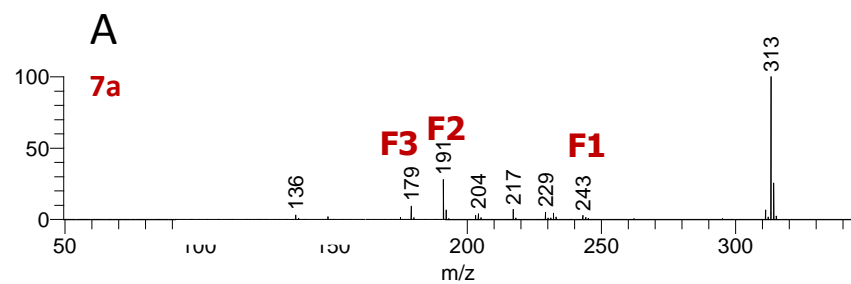

**B**

|           | Name             | RT [min] | [M-H] <sup>-</sup>                                         | [MF1-H] <sup>-</sup>                                       | [MF2-H] <sup>-</sup>                                       | [MF3-H] <sup>-</sup>                                       |
|-----------|------------------|----------|------------------------------------------------------------|------------------------------------------------------------|------------------------------------------------------------|------------------------------------------------------------|
| <b>7a</b> | CBL <sup>a</sup> | 11.83    | 313.2173<br>C <sub>21</sub> H <sub>29</sub> O <sub>2</sub> | 243.1391<br>C <sub>16</sub> H <sub>19</sub> O <sub>2</sub> | 191.1078<br>C <sub>12</sub> H <sub>15</sub> O <sub>2</sub> | 179.1067<br>C <sub>11</sub> H <sub>15</sub> O <sub>2</sub> |

<sup>a</sup>Analytical standard

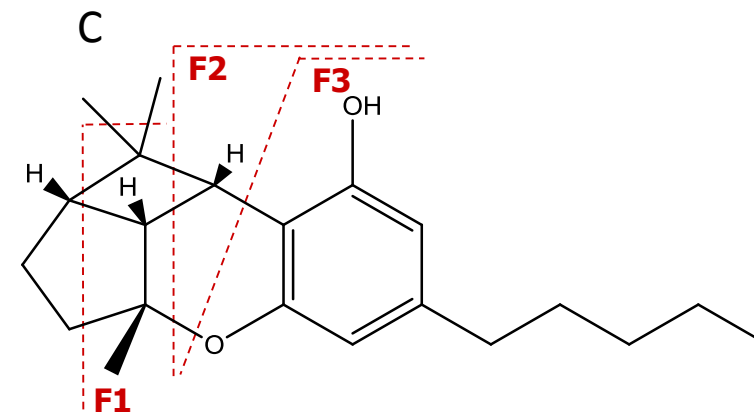

**Figure S9. MS/MS spectral library of CBL.** (A) MS/MS spectrum of CBL, (B) name, retention time and accurate mass, and (C) its fragmentation structure. Values of m/z in (A) are presented as nominal masses to improve interpretation of spectra. Accurate masses for the main fragments appear in (B).

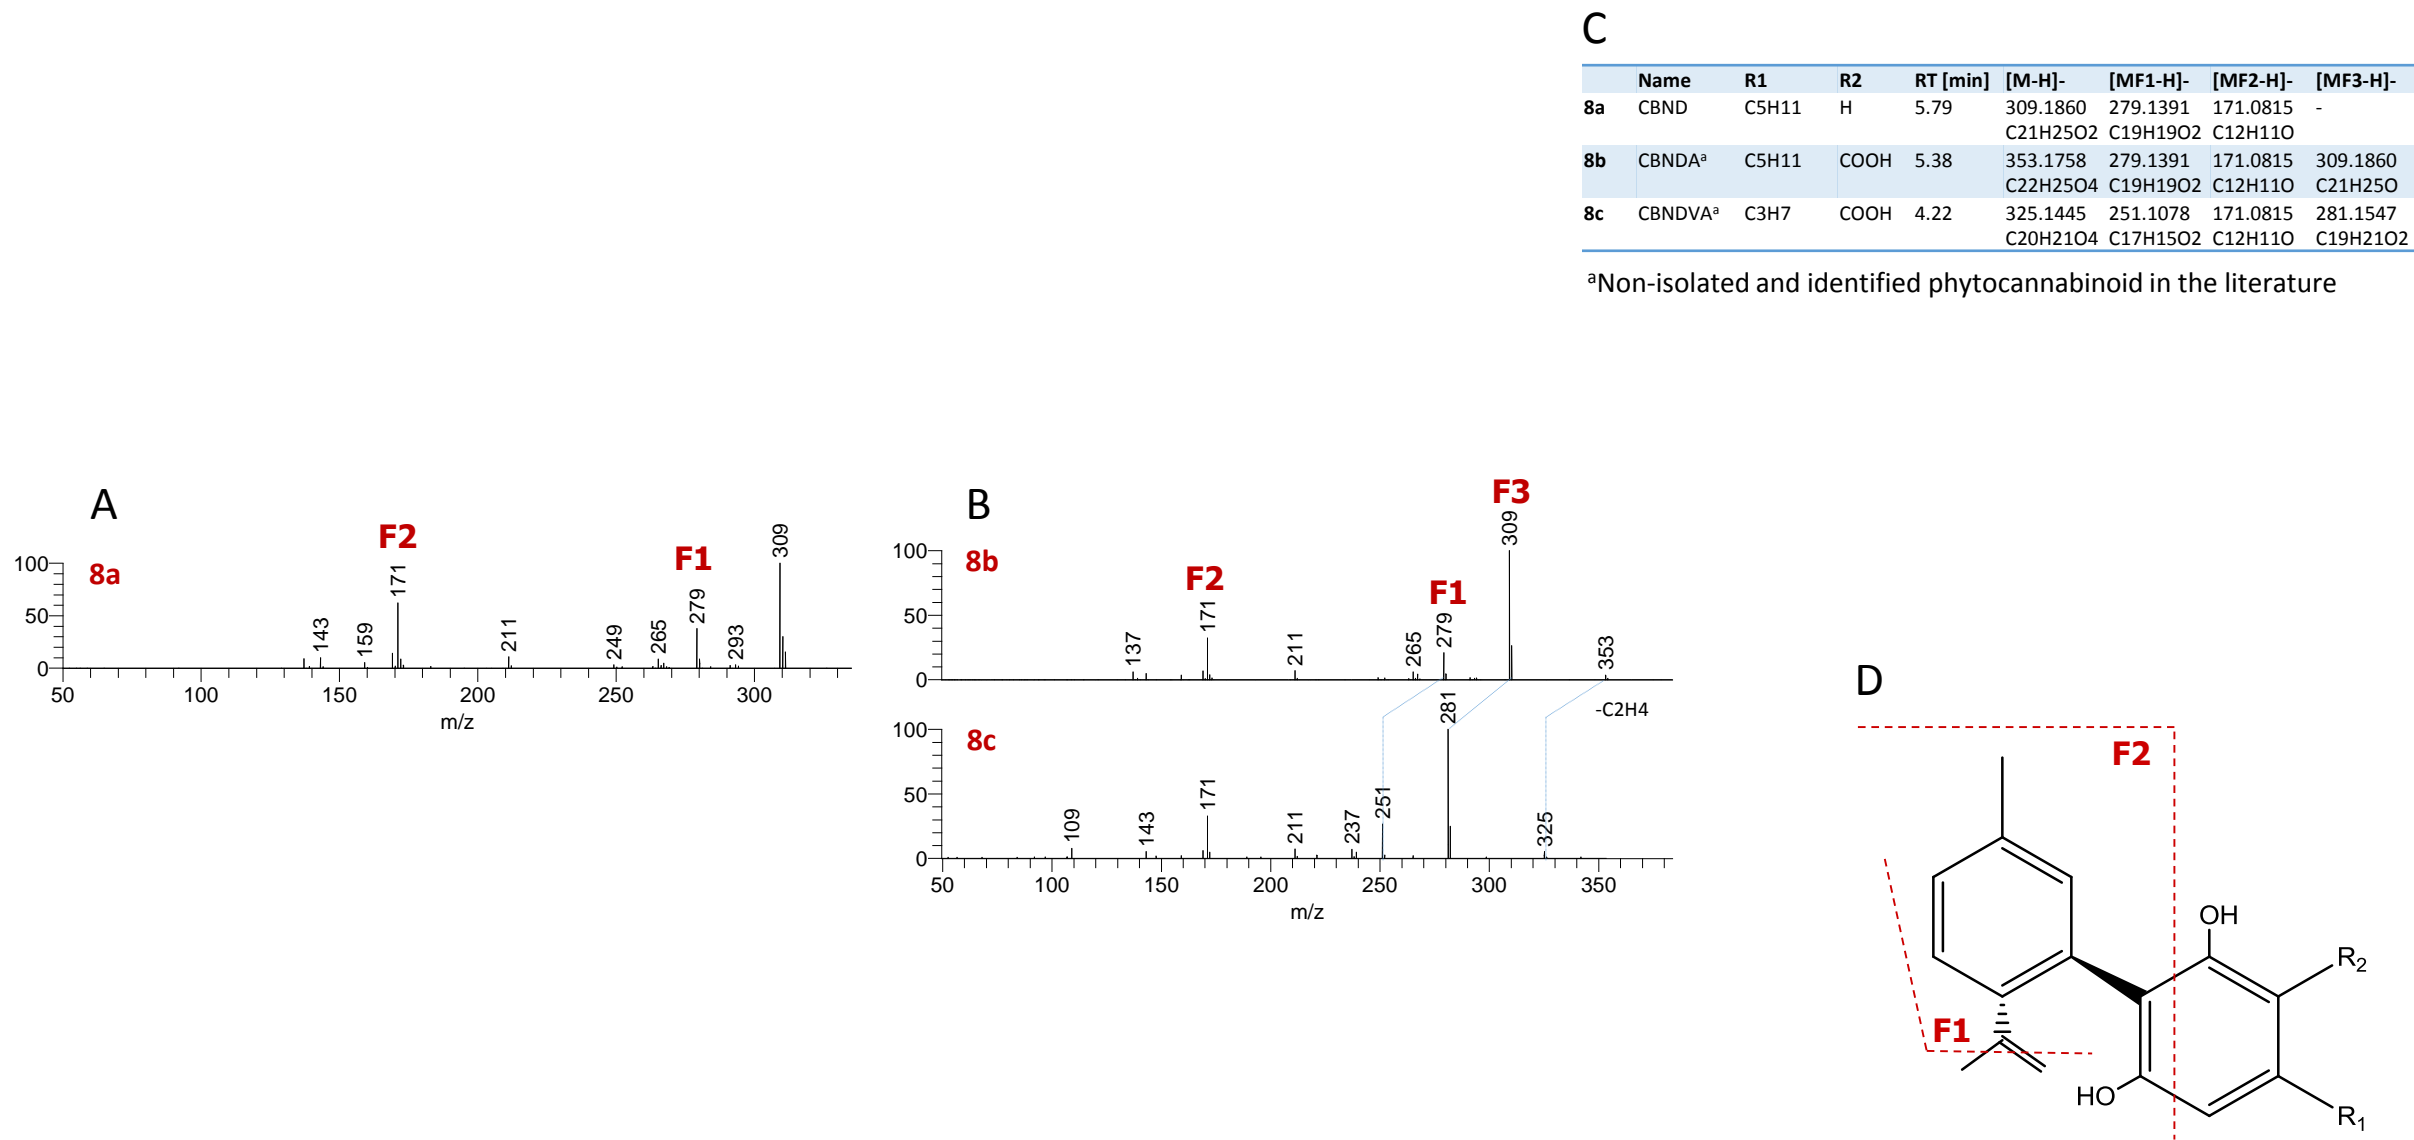

**Figure S10. MS/MS spectral library of CBND-type phytocannabinoids.** MS/MS spectra of the identified CBND type (**A**) neutral and (**B**) acid phytocannabinoids, (**C**) names, retention times and accurate masses, and (**D**) their fragmentation structures. Values of  $m/z$  in (**A**) and (**B**) are presented as nominal masses to improve interpretation of spectra. Accurate masses for the main fragments appear in (**C**).

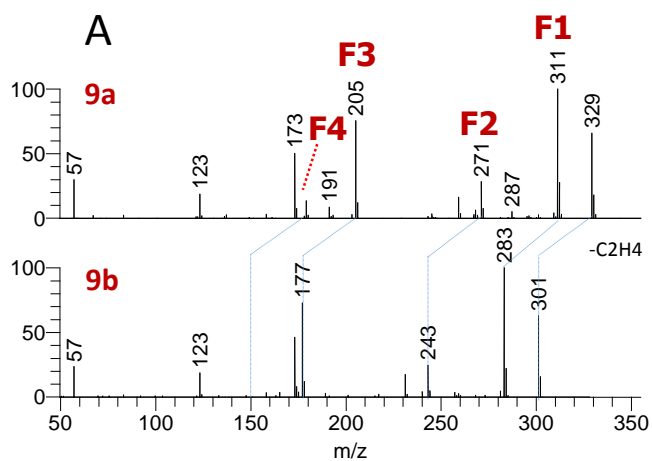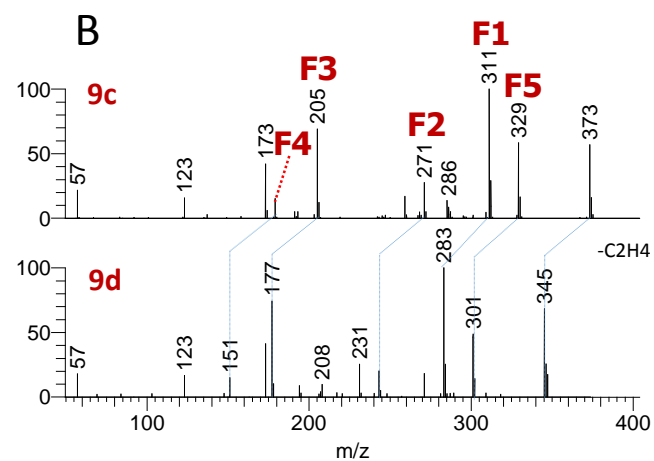

**C**

| Name | R1    | R2   | RT [min] | [M-H] <sup>-</sup> | [MF1-H] <sup>-</sup> | [MF2-H] <sup>-</sup> | [MF3-H] <sup>-</sup> | [MF4-H] <sup>-</sup> | [MF5-H] <sup>-</sup> |
|------|-------|------|----------|--------------------|----------------------|----------------------|----------------------|----------------------|----------------------|
| 9a   | C5H11 | H    | 6.64     | 329.2122           | 311.2017             | 271.1704             | 205.1234             | 179.1067             | -                    |
|      |       |      |          | C21H29O3           | C21H27O2             | C18H23O2             | C13H17O2             | C11H15O2             |                      |
| 9b   | C3H7  | H    | 4.80     | 301.1809           | 283.1704             | 243.1391             | 177.0921             | 151.0765             | -                    |
|      |       |      |          | C19H25O3           | C19H23O2             | C16H19O2             | C11H13O2             | C9H11O2              |                      |
| 9c   | C5H11 | COOH | 6.74     | 373.2021           | 311.2017             | 271.1704             | 205.1234             | 179.1067             | 329.2122             |
|      |       |      |          | C21H29O5           | C21H27O2             | C18H23O2             | C13H17O2             | C11H15O2             | C21H29O3             |
| 9d   | C3H7  | COOH | 4.79     | 345.1707           | 283.1704             | 243.1391             | 177.0921             | 151.0765             | 301.1809             |
|      |       |      |          | C19H29O5           | C19H23O2             | C16H19O2             | C11H13O2             | C9H11O2              | C19H25O3             |

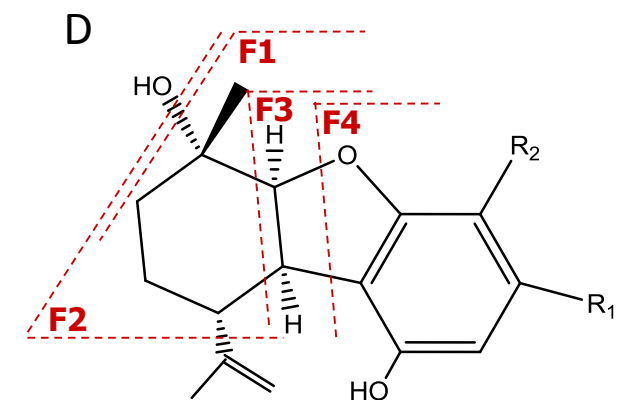

**Figure S11. MS/MS spectral library of CBE-type phytocannabinoids.** MS/MS spectra of the identified CBE type (**A**) neutral and (**B**) acid phytocannabinoids, (**C**) names, retention times and accurate masses, and (**D**) their fragmentation structures. Values of m/z in (**A**) and (**B**) are presented as nominal masses to improve interpretation of spectra. Accurate masses for the main fragments appear in (**C**).

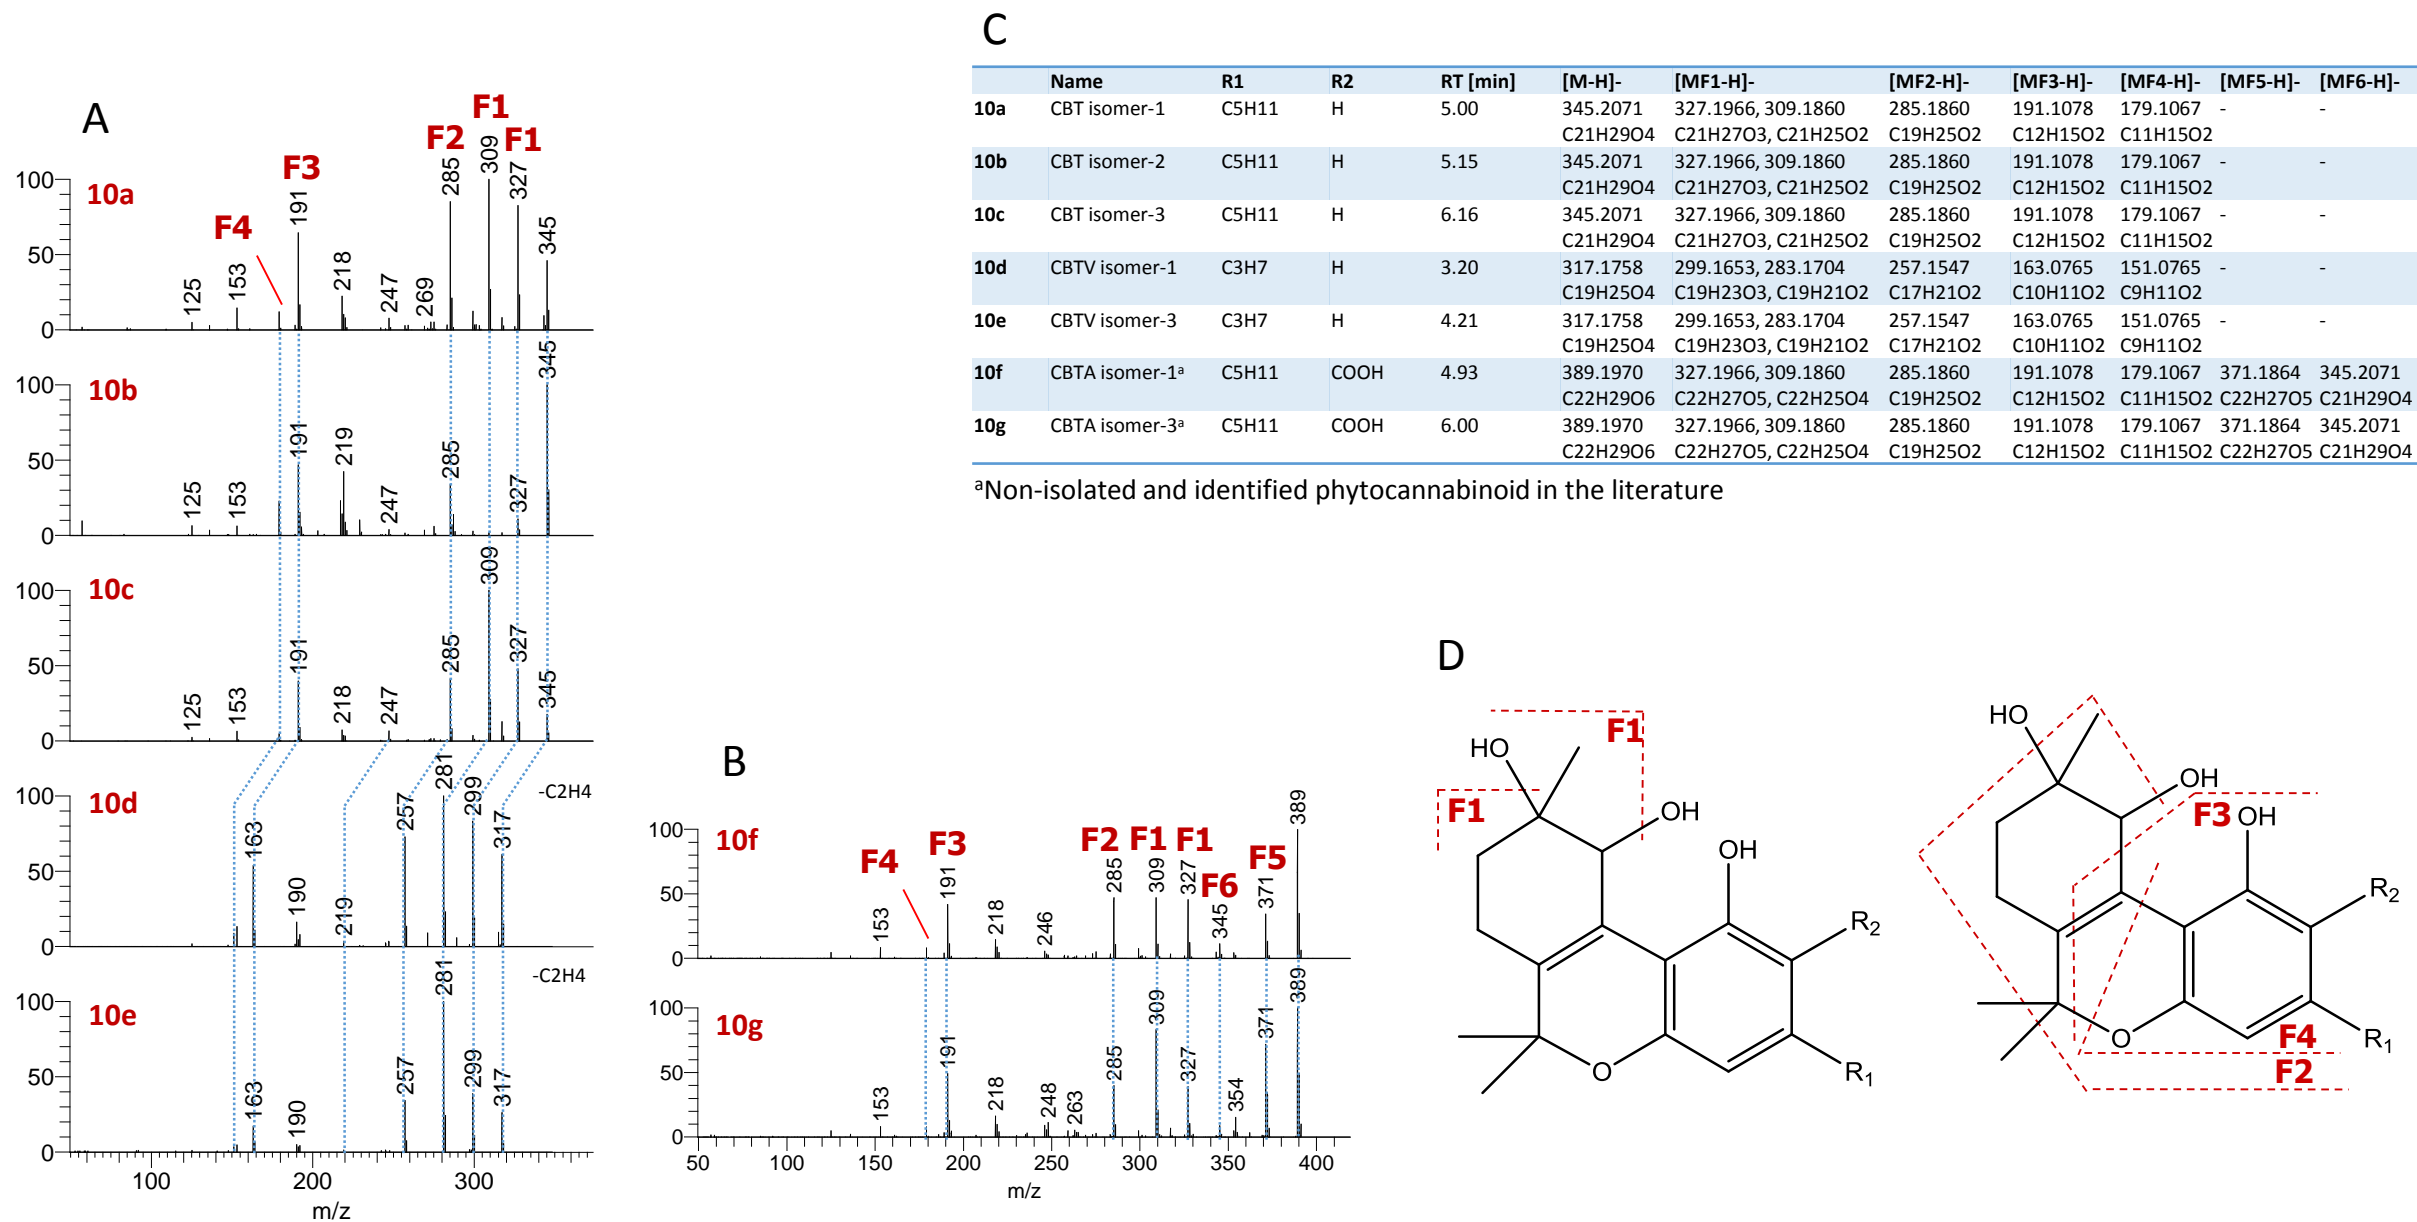

**Figure S12. MS/MS spectral library of CBT-type phytocannabinoids.** MS/MS spectra of the identified CBT type (A) neutral and (B) acid phytocannabinoids, (C) names, retention times and accurate masses, and (D) their fragmentation structures. Values of  $m/z$  in (A) and (B) are presented as nominal masses to improve interpretation of spectra. Accurate masses for the main fragments appear in (C).

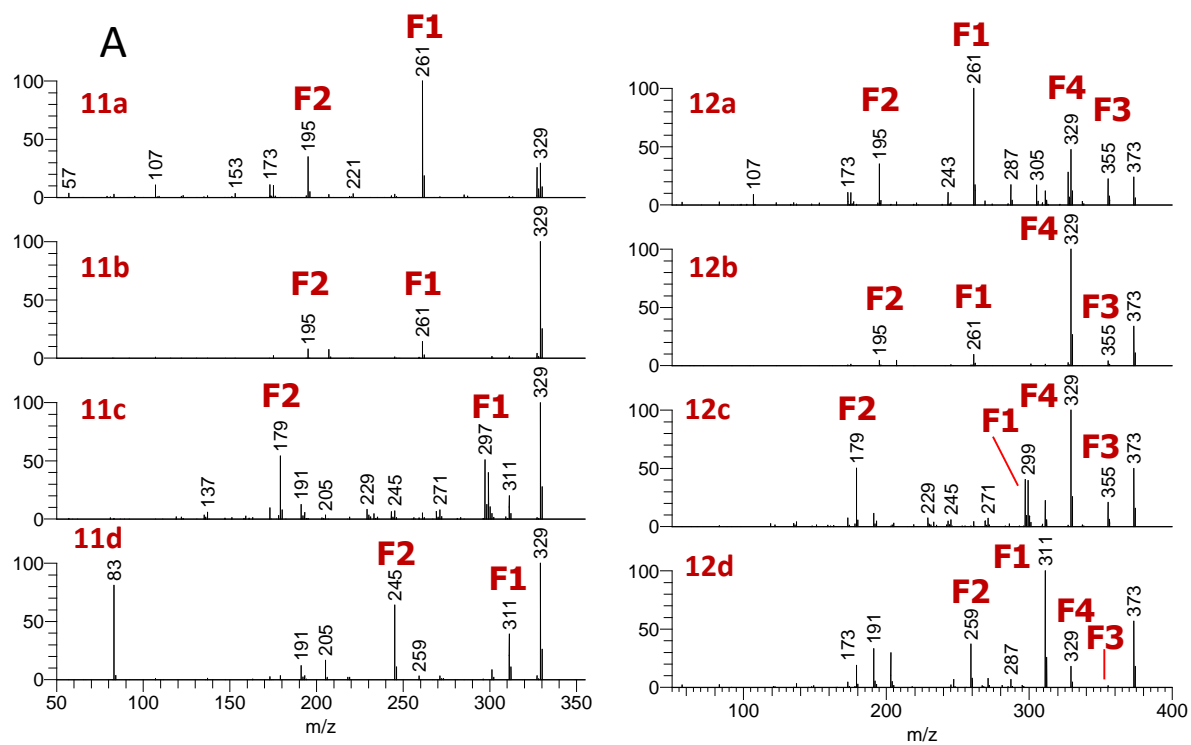

|            | Chemical formula | Acid-neutral pairing | RT [min] | [M-H]-   | [MF1-H]- | [MF2-H]- | [MF3-H]- | [MF4-H]- |
|------------|------------------|----------------------|----------|----------|----------|----------|----------|----------|
| <b>11a</b> | C21H30O3         | A                    | 4.04     | 329.2122 | 261.1496 | 195.1027 | -        | -        |
|            |                  |                      |          | C21H29O3 | C16H21O3 | C11H15O3 |          |          |
| <b>11b</b> | C21H30O3         | B                    | 5.06     | 329.2122 | 261.1496 | 195.1027 | -        | -        |
|            |                  |                      |          | C21H29O3 | C16H21O3 | C11H15O3 |          |          |
| <b>11c</b> | C21H30O3         | C                    | 5.15     | 329.2122 | 297.1860 | 179.1078 | -        | -        |
|            |                  |                      |          | C21H29O3 | C20H25O2 | C11H15O2 |          |          |
| <b>11d</b> | C21H30O3         | -                    | 9.26     | 329.2122 | 311.2017 | 245.1547 | -        | -        |
|            |                  |                      |          | C21H29O3 | C21H27O2 | C16H21O2 |          |          |
| <b>12a</b> | C22H30O5         | A                    | 4.41     | 373.2021 | 261.1496 | 195.1027 | 355.1915 | 329.2122 |
|            |                  |                      |          | C22H29O5 | C16H21O3 | C11H15O3 | C22H27O4 | C21H29O3 |
| <b>12b</b> | C22H30O5         | B                    | 6.33     | 373.2021 | 261.1496 | 195.1027 | 355.1915 | 329.2122 |
|            |                  |                      |          | C22H29O5 | C16H21O3 | C11H15O3 | C22H27O4 | C21H29O3 |
| <b>12c</b> | C22H30O5         | C                    | 5.64     | 373.2021 | 297.1860 | 179.1078 | 355.1915 | 329.2122 |
|            |                  |                      |          | C22H29O5 | C20H25O2 | C11H15O2 | C22H27O4 | C21H29O3 |
| <b>12d</b> | C22H30O5         | -                    | 9.83     | 373.2021 | 311.2017 | 259.1704 | 355.1915 | 329.2122 |
|            |                  |                      |          | C22H29O5 | C21H27O2 | C16H21O2 | C22H27O4 | C21H29O3 |

**Figure S13. MS/MS spectral library of additional phytocannabinoids (Part I).** (A) MS/MS spectra, and (B) names, retention times and accurate masses. Values of m/z in (A) are presented as nominal masses to improve interpretation of spectra. Accurate masses for the main fragments appear in (B).

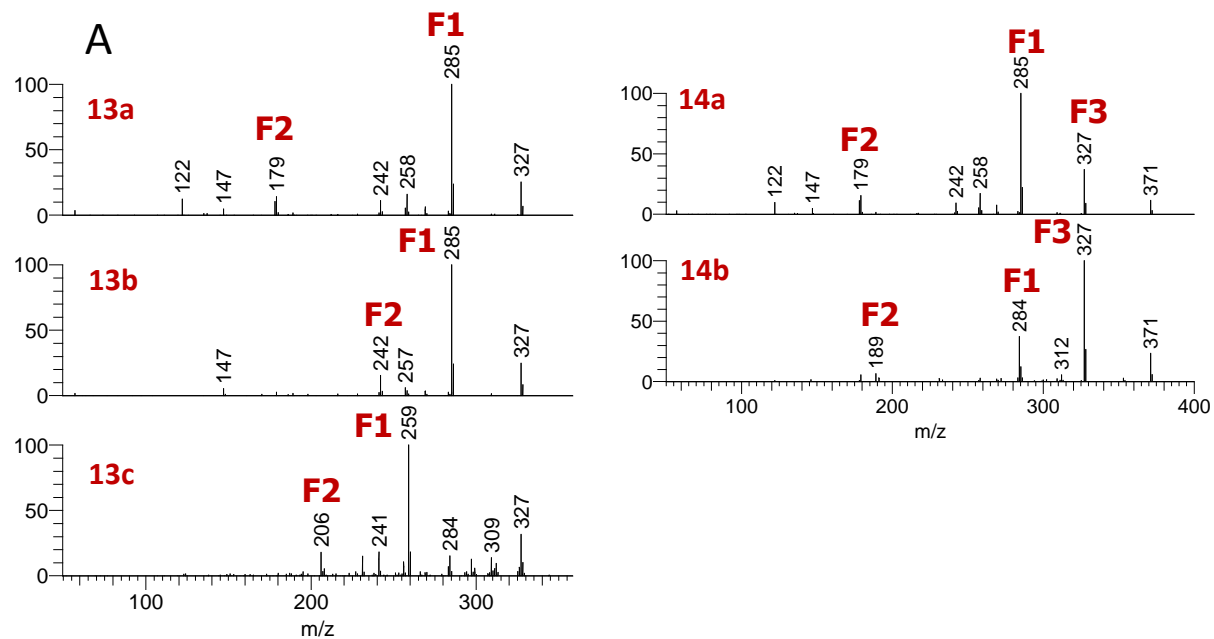

**B**

|            | Chemical formula                               | Acid-neutral pairing | RT [min] | [M-H]-                                         | [MF1-H]-                                       | [MF2-H]-                                       | [MF3-H]-                                       |
|------------|------------------------------------------------|----------------------|----------|------------------------------------------------|------------------------------------------------|------------------------------------------------|------------------------------------------------|
| <b>13a</b> | C <sub>21</sub> H <sub>28</sub> O <sub>3</sub> | A                    | 6.49     | 327.1966                                       | 285.1860                                       | 179.1078                                       | -                                              |
|            |                                                |                      |          | C <sub>21</sub> H <sub>27</sub> O <sub>3</sub> | C <sub>19</sub> H <sub>25</sub> O <sub>2</sub> | C <sub>11</sub> H <sub>15</sub> O <sub>2</sub> |                                                |
| <b>13b</b> | C <sub>21</sub> H <sub>28</sub> O <sub>3</sub> | -                    | 5.97     | 327.1966                                       | 285.1860                                       | 242.1312                                       | -                                              |
|            |                                                |                      |          | C <sub>21</sub> H <sub>27</sub> O <sub>3</sub> | C <sub>19</sub> H <sub>25</sub> O <sub>2</sub> | C <sub>16</sub> H <sub>18</sub> O <sub>2</sub> |                                                |
| <b>13c</b> | C <sub>21</sub> H <sub>28</sub> O <sub>3</sub> | -                    | 11.06    | 327.1966                                       | 259.1340                                       | 206.0948                                       | -                                              |
|            |                                                |                      |          | C <sub>21</sub> H <sub>27</sub> O <sub>3</sub> | C <sub>16</sub> H <sub>19</sub> O <sub>3</sub> | C <sub>12</sub> H <sub>14</sub> O <sub>3</sub> |                                                |
| <b>14a</b> | C <sub>22</sub> H <sub>28</sub> O <sub>5</sub> | A                    | 6.75     | 371.1864                                       | 285.1860                                       | 179.1078                                       | 327.1966                                       |
|            |                                                |                      |          | C <sub>22</sub> H <sub>27</sub> O <sub>5</sub> | C <sub>19</sub> H <sub>25</sub> O <sub>2</sub> | C <sub>11</sub> H <sub>15</sub> O <sub>2</sub> | C <sub>21</sub> H <sub>27</sub> O <sub>3</sub> |
| <b>14b</b> | C <sub>22</sub> H <sub>28</sub> O <sub>5</sub> | -                    | 8.04     | 371.1864                                       | 284.1418                                       | 189.0921                                       | 327.1966                                       |
|            |                                                |                      |          | C <sub>22</sub> H <sub>27</sub> O <sub>5</sub> | C <sub>18</sub> H <sub>20</sub> O <sub>3</sub> | C <sub>12</sub> H <sub>13</sub> O <sub>2</sub> | C <sub>21</sub> H <sub>27</sub> O <sub>3</sub> |

**Figure S13. MS/MS spectral library of additional phytocannabinoids (Part II).** (A) MS/MS spectra, and (B) names, retention times and accurate masses. Values of m/z in (A) are presented as nominal masses to improve interpretation of spectra. Accurate masses for the main fragments appear in (B).

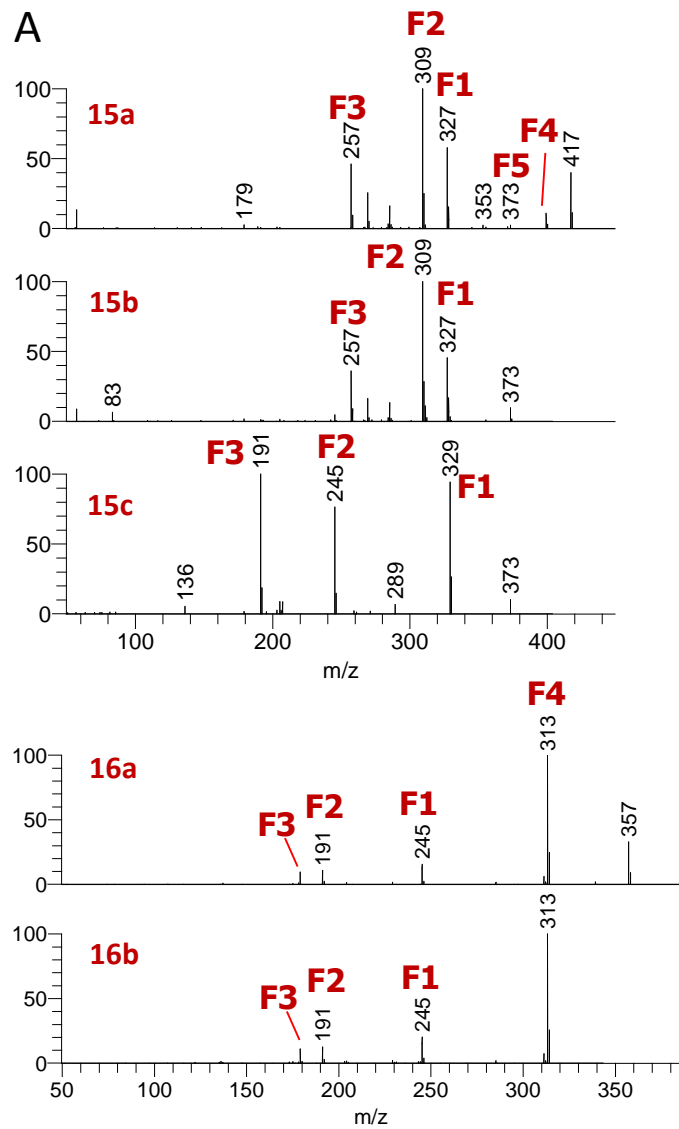

**B**

|            | Chemical formula | Acid-neutral pairing | RT [min] | [M-H]-   | [MF1-H]- | [MF2-H]- | [MF3-H]- | [MF4-H]- | [MF5-H]- |
|------------|------------------|----------------------|----------|----------|----------|----------|----------|----------|----------|
| <b>15a</b> | C24H34O6         | A                    | 6.2      | 417.2283 | 327.1966 | 309.1860 | 257.1547 | 399.2177 | 373.2384 |
|            |                  |                      |          | C24H33O6 | C21H27O3 | C21H25O2 | C17H21O2 | C24H31O5 | C23H33O4 |
| <b>15b</b> | C23H34O4         | A                    | 7.48     | 373.2384 | 327.1966 | 309.1860 | 257.1547 | -        | -        |
|            |                  |                      |          | C23H33O4 | C21H27O3 | C21H25O2 | C17H21O2 | -        | -        |
| <b>15c</b> | C23H34O4         | -                    | 13.15    | 373.2384 | 329.2486 | 245.1547 | 191.1078 | -        | -        |
|            |                  |                      |          | C23H33O4 | C22H33O2 | C16H21O2 | C12H15O2 | -        | -        |
| <b>16a</b> | C22H30O4         | B                    | 12.31    | 357.2071 | 245.1547 | 191.1078 | 179.1067 | -        | 313.2173 |
|            |                  |                      |          | C22H29O4 | C16H21O2 | C12H15O2 | C11H15O2 | -        | C21H29O2 |
| <b>16b</b> | C21H30O2         | B                    | 10.83    | 313.2173 | 245.1547 | 191.1078 | 179.1067 | -        | -        |
|            |                  |                      |          | C21H29O2 | C16H21O2 | C12H15O2 | C11H15O2 | -        | -        |
| <b>17a</b> | C21H30O5         | -                    | 6.43     | 361.2021 | 343.1915 | 325.1809 | 207.1027 | 179.1067 | -        |
| <b>17b</b> | C21H30O5         | -                    | 3.64     | 361.2021 | 333.2071 | 191.1078 | 179.1067 | -        | -        |
|            |                  |                      |          | C21H29O5 | C20H29O4 | C12H15O2 | C11H15O2 | -        | -        |

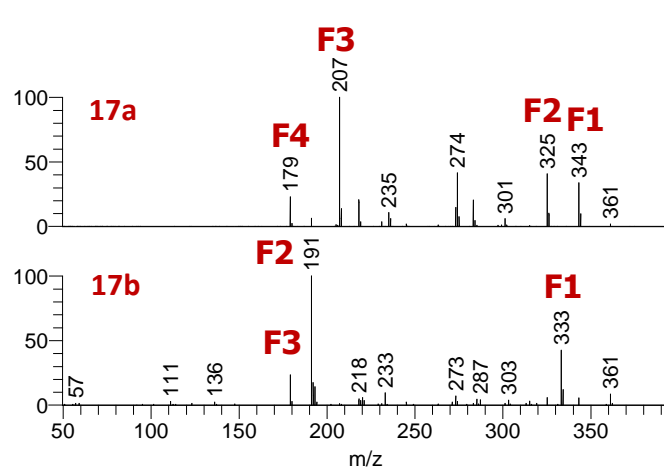

**Figure S13. MS/MS spectral library of additional phytocannabinoids (Part III).** (A) MS/MS spectra, and (B) names, retention times and accurate masses. Values of m/z in (A) are presented as nominal masses to improve interpretation of spectra. Accurate masses for the main fragments appear in (B).

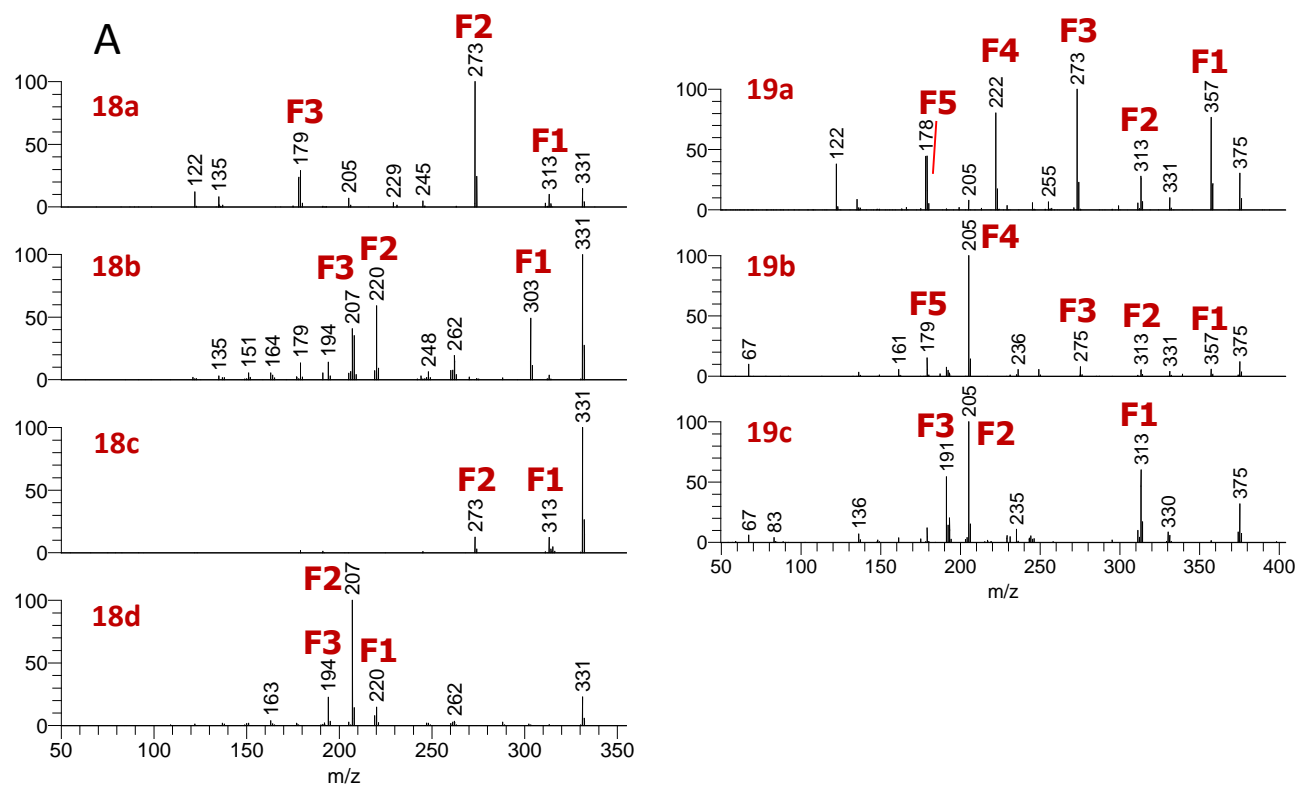

**B**

|            | Chemical formula                               | RT [min] | [M-H]-                                         | [MF1-H]-                                       | [MF2-H]-                                       | [MF3-H]-                                       | [MF4-H]-                                       | [MF5-H]-                                       |
|------------|------------------------------------------------|----------|------------------------------------------------|------------------------------------------------|------------------------------------------------|------------------------------------------------|------------------------------------------------|------------------------------------------------|
| <b>18a</b> | C <sub>21</sub> H <sub>32</sub> O <sub>3</sub> | 5.60     | 331.2279                                       | 313.2173                                       | 273.1860                                       | 179.1067                                       | -                                              | -                                              |
|            |                                                |          | C <sub>21</sub> H <sub>31</sub> O <sub>3</sub> | C <sub>21</sub> H <sub>29</sub> O <sub>2</sub> | C <sub>18</sub> H <sub>25</sub> O <sub>2</sub> | C <sub>11</sub> H <sub>15</sub> O <sub>2</sub> |                                                |                                                |
| <b>18b</b> | C <sub>21</sub> H <sub>32</sub> O <sub>3</sub> | 7.58     | 331.2279                                       | 303.2330                                       | 220.1105                                       | 207.1027                                       | -                                              | -                                              |
|            |                                                |          | C <sub>21</sub> H <sub>31</sub> O <sub>3</sub> | C <sub>20</sub> H <sub>31</sub> O <sub>2</sub> | C <sub>13</sub> H <sub>16</sub> O <sub>3</sub> | C <sub>12</sub> H <sub>15</sub> O <sub>3</sub> |                                                |                                                |
| <b>18c</b> | C <sub>21</sub> H <sub>32</sub> O <sub>3</sub> | 8.74     | 331.2279                                       | 313.2173                                       | 273.1860                                       | -                                              | -                                              |                                                |
|            |                                                |          | C <sub>21</sub> H <sub>31</sub> O <sub>3</sub> | C <sub>21</sub> H <sub>29</sub> O <sub>2</sub> | C <sub>18</sub> H <sub>25</sub> O <sub>2</sub> |                                                |                                                |                                                |
| <b>18d</b> | C <sub>21</sub> H <sub>32</sub> O <sub>3</sub> | 10.12    | 331.2279                                       | 220.1105                                       | 207.1027                                       | 194.0948                                       | -                                              | -                                              |
|            |                                                |          | C <sub>21</sub> H <sub>31</sub> O <sub>3</sub> | C <sub>13</sub> H <sub>16</sub> O <sub>3</sub> | C <sub>12</sub> H <sub>15</sub> O <sub>3</sub> | C <sub>11</sub> H <sub>14</sub> O <sub>3</sub> |                                                |                                                |
| <b>19a</b> | C <sub>22</sub> H <sub>32</sub> O <sub>5</sub> | 4.80     | 375.2177                                       | 357.2071                                       | 313.2173                                       | 273.1860                                       | 222.0898                                       | 179.1067                                       |
|            |                                                |          | C <sub>22</sub> H <sub>31</sub> O <sub>5</sub> | C <sub>22</sub> H <sub>29</sub> O <sub>4</sub> | C <sub>21</sub> H <sub>29</sub> O <sub>2</sub> | C <sub>18</sub> H <sub>25</sub> O <sub>2</sub> | C <sub>12</sub> H <sub>14</sub> O <sub>4</sub> | C <sub>11</sub> H <sub>15</sub> O <sub>2</sub> |
| <b>19b</b> | C <sub>22</sub> H <sub>32</sub> O <sub>5</sub> | 3.95     | 375.2177                                       | 357.2071                                       | 313.2173                                       | 275.2017                                       | 205.1234                                       | 179.1067                                       |
|            |                                                |          | C <sub>22</sub> H <sub>31</sub> O <sub>5</sub> | C <sub>22</sub> H <sub>29</sub> O <sub>4</sub> | C <sub>21</sub> H <sub>29</sub> O <sub>2</sub> | C <sub>13</sub> H <sub>17</sub> O <sub>2</sub> | C <sub>13</sub> H <sub>17</sub> O <sub>2</sub> | C <sub>11</sub> H <sub>15</sub> O <sub>2</sub> |
| <b>19c</b> | C <sub>22</sub> H <sub>32</sub> O <sub>5</sub> | 9.06     | 375.2177                                       | 313.2173                                       | 205.1234                                       | 191.1078                                       | -                                              | -                                              |
|            |                                                |          | C <sub>22</sub> H <sub>31</sub> O <sub>5</sub> | C <sub>21</sub> H <sub>29</sub> O <sub>2</sub> | C <sub>13</sub> H <sub>17</sub> O <sub>2</sub> | C <sub>12</sub> H <sub>15</sub> O <sub>2</sub> |                                                |                                                |

**Figure S13. MS/MS spectral library of additional phytocannabinoids (Part IV).** (A) MS/MS spectra, and (B) names, retention times and accurate masses. Values of m/z in (A) are presented as nominal masses to improve interpretation of spectra. Accurate masses for the main fragments appear in (B).



**Table S1.** List of neutral and acid potential masses of phytocannabinoids used in data dependent MS/MS mode

| Phytocannabinoid subclass | Neutral-type phytocannabinoids                                                            |                  |                    | Acid-type phytocannabinoids                                                                       |                  |                    |
|---------------------------|-------------------------------------------------------------------------------------------|------------------|--------------------|---------------------------------------------------------------------------------------------------|------------------|--------------------|
|                           | Name                                                                                      | Chemical Formula | [M-H] <sup>-</sup> | Name                                                                                              | Chemical Formula | [M-H] <sup>-</sup> |
| CBN                       | Cannabiorcol-C1 (CBNO)                                                                    | C17H18O2         | 253.12340          | Cannabiorcolic acid-c1 (CBNOA)*                                                                   | C18H18O4         | 297.11323          |
| CBND                      | CBND-C1 (CBNDO)*                                                                          | C17H18O2         | 253.12340          | CBNDA-C1 (CBNDOA)*                                                                                | C18H18O4         | 297.11323          |
| $\Delta^9$ -THC           | (-)- $\Delta^9$ - <i>trans</i> -Tetrahydrocannabiorcol-C1 ( $\Delta^9$ -THCO)             | C17H22O2         | 257.15470          | (-)- $\Delta^9$ - <i>trans</i> -Tetrahydrocannabiorcolic acid-C1 ( $\Delta^9$ -THCOA)             | C18H22O4         | 301.14453          |
| CBD                       | Cannabidiol-C1 (CBDO)                                                                     | C17H22O2         | 257.15470          | Cannabidiolcolic acid-C1 (CBDOA)*                                                                 | C18H22O4         | 301.14453          |
| CBC                       | Cannabiorchromene-C1 (CBCO)                                                               | C17H22O2         | 257.15470          | Cannabiorchromenic acid-C1 (CBCOA)                                                                | C18H22O4         | 301.14453          |
| $\Delta^8$ -THC           | (-)- $\Delta^8$ - <i>trans</i> -(6aR,10aR)-Tetrahydrocannabiorcol-C1 ( $\Delta^8$ -THCO)* | C17H22O2         | 257.15470          | (-)- $\Delta^8$ - <i>trans</i> -(6aR,10aR)-Tetrahydrocannabiorcolic acid-C1 ( $\Delta^8$ -THCOA)* | C18H22O4         | 301.14453          |
| CBL                       | Cannabiorcyclo C1 (CBLO)                                                                  | C17H22O2         | 257.15470          | Cannabiorcycloic acid C1 (CBLOA)                                                                  | C18H22O4         | 301.14453          |
| CBG                       | CBG-C1 (CBGO)*                                                                            | C17H24O2         | 259.17035          | CBGA-C1 (CBGOA)*                                                                                  | C18H24O4         | 303.16018          |
| CBN                       | Cannabinol-C2 (CBN-C2)                                                                    | C18H20O2         | 267.13905          | CBNA-C2*                                                                                          | C19H20O4         | 311.12888          |
| CBND                      | CBND-C2*                                                                                  | C18H20O2         | 267.13905          | CBNDA-C2*                                                                                         | C19H20O4         | 311.12888          |
| $\Delta^9$ -THC           | $\Delta^9$ -THC-C2*                                                                       | C18H24O2         | 271.17035          | $\Delta^9$ -THCA-C2*                                                                              | C19H24O4         | 315.16018          |
| CBD                       | CBD-C2*                                                                                   | C18H24O2         | 271.17035          | CBDA-C2*                                                                                          | C19H24O4         | 315.16018          |
| CBC                       | CBC-C2*                                                                                   | C18H24O2         | 271.17035          | CBCA-C2*                                                                                          | C19H24O4         | 315.16018          |
| $\Delta^8$ -THC           | $\Delta^8$ -THC-C2*                                                                       | C18H24O2         | 271.17035          | $\Delta^8$ -THCA-C2*                                                                              | C19H24O4         | 315.16018          |
| CBL                       | CBL-C2*                                                                                   | C18H24O2         | 271.17035          | CBLA-C2*                                                                                          | C19H24O4         | 315.16018          |
| CBE                       | Bisnor-cannabielsoin-C1 (CBEO)                                                            | C17H22O3         | 273.14962          | Bisnor-cannabielsoinic acid-C1 (CBEOA)                                                            | C18H22O5         | 317.13945          |
| CBG                       | CBG-C2*                                                                                   | C18H26O2         | 273.18600          | CBGA-C2*                                                                                          | C19H26O4         | 317.17583          |
| CBN                       | Cannabivarin-C3 (CBNV)                                                                    | C19H22O2         | 281.15470          | CBNA-C3 (CBNVA)*                                                                                  | C20H22O4         | 325.14453          |
| CBND                      | Cannabinodivarin-C3 (CBNDV)                                                               | C19H22O2         | 281.15470          | CBNDA-C3 (CBNDVA)*                                                                                | C20H22O4         | 325.14453          |
| $\Delta^9$ -THC           | (-)- $\Delta^9$ - <i>trans</i> -Tetrahydrocannabivarin-C3 ( $\Delta^9$ -THCV)             | C19H26O2         | 285.18600          | (-)- $\Delta^9$ - <i>trans</i> -Tetrahydrocannabivarinic acid-C3 ( $\Delta^9$ -THCVA)             | C20H26O4         | 329.17583          |

|                 |                                                                               |          |           |                                                                                       |          |           |
|-----------------|-------------------------------------------------------------------------------|----------|-----------|---------------------------------------------------------------------------------------|----------|-----------|
| CBD             | (-)-Cannabidivarin-C3 (CBDV)                                                  | C19H26O2 | 285.18600 | Cannabidivarinic acid-C3 (CBDVA)                                                      | C20H26O4 | 329.17583 |
| CBC             | (±)-Cannabichromevarin-C3 (CBCV)                                              | C19H26O2 | 285.18600 | (±)-Cannabichromevarinic acid-C3 (CBCVA)                                              | C20H26O4 | 329.17583 |
| $\Delta^8$ -THC | (-)- $\Delta^8$ - <i>trans</i> -THC-C3 ( $\Delta^8$ -THCV)*                   | C19H26O2 | 285.18600 | (-)- $\Delta^8$ - <i>trans</i> -THCA-C3 ( $\Delta^8$ -THCVA)*                         | C20H26O4 | 329.17583 |
| CBL             | (±)-(1aS,3aR,8bR,8cR)-Cannabicyclovarin-C3 (CBLV)                             | C19H26O2 | 285.18600 | Cannabicyclic acid-C3 (CBLVA)                                                         | C20H26O4 | 329.17583 |
| CBC             | 2-Methyl-2-(4-methyl-2-pentenyl)-7-propyl-2H-1-benzopyran-5-ol                | C19H26O2 | 285.18600 | 2-Methyl-2-(4-methyl-2-pentenyl)-7-propyl-2H-1-benzopyran-5-ol acid*                  | C20H26O4 | 329.17583 |
| Miscellaneous   | $\Delta^7$ -tetrahydrocannabivarin-C3 ( $\Delta^7$ -THCV)                     | C19H26O2 | 285.18600 | $\Delta^7$ -tetrahydrocannabivarinic acid-C3 ( $\Delta^7$ -THCVA)*                    | C20H26O4 | 329.17583 |
| CBE             | CBE-C2*                                                                       | C18H24O3 | 287.16527 | CBEA-C2*                                                                              | C19H24O5 | 331.15510 |
| CBG             | Cannabigerovarin-C3 (CBGV)                                                    | C19H28O2 | 287.20165 | Cannabigerovarinic acid-C3 (CBGVA)                                                    | C20H28O4 | 331.19148 |
| CBT             | Cannabitol-C1 (CBTO)                                                          | C17H22O4 | 289.14453 | Cannabitolic acid-C1 (CBTOA)*                                                         | C18H22O6 | 333.13436 |
| CBN             | Cannabinol-C4 (CBN-C4)                                                        | C20H24O2 | 295.17035 | Cannabinolic acid-C4 (CBNA-C4)*                                                       | C21H24O4 | 339.16018 |
| CBND            | CBND-C4*                                                                      | C20H24O4 | 295.17035 | CBNDA-C4*                                                                             | C21H24O4 | 339.16018 |
| $\Delta^9$ -THC | (-)- $\Delta^9$ - <i>trans</i> -Tetrahydrocannabinol-C4 ( $\Delta^9$ -THC-C4) | C20H28O2 | 299.20165 | (-)- $\Delta^9$ - <i>trans</i> -Tetrahydrocannabinolic acid-C4 ( $\Delta^9$ -THCA-C4) | C21H28O4 | 343.19148 |
| CBD             | Cannabidiol-C4 (CBD-C4)                                                       | C20H28O2 | 299.20165 | CBDA-C4*                                                                              | C21H28O4 | 343.19148 |
| CBC             | CBC-C4*                                                                       | C20H28O2 | 299.20165 | CBCA-C4*                                                                              | C21H28O4 | 343.19148 |
| $\Delta^8$ -THC | (-)- <i>trans</i> - $\Delta^8$ -THC-C4*                                       | C20H28O2 | 299.20165 | (-)- <i>trans</i> - $\Delta^8$ -THCA-C4*                                              | C21H28O4 | 343.19148 |
| CBL             | CBL-C4*                                                                       | C20H28O2 | 299.20165 | CBLA-C4*                                                                              | C21H28O4 | 343.19148 |
| CBE             | Cannabielsoin-C3 (CBEV)                                                       | C19H26O3 | 301.18092 | Cannabielsoic acid-C3 (CBEVA)                                                         | C20H26O5 | 345.17075 |
| CBG             | CBG-C4*                                                                       | C20H30O2 | 301.21730 | CBGA-C4*                                                                              | C21H30O4 | 345.20713 |
| CBT             | CBT-C2*                                                                       | C18H24O4 | 303.16018 | CBTA-C2*                                                                              | C19H24O6 | 347.15001 |
| Miscellaneous   | Cannabichromanone-C3                                                          | C18H24O4 | 303.16018 | Cannabichromanonic acid-C3*                                                           | C19H24O6 | 347.15001 |
| Miscellaneous   | Cannabiglendol-C3 (OH-iso-HHCV-C3)                                            | C19H28O3 | 303.19657 | Cannabiglendolic acid-C3 (OH-iso-HHCVA-C3)*                                           | C20H28O5 | 347.18640 |
| Miscellaneous   | Cannabioxepane-C5 (CBX)                                                       | C21H22O2 | 305.15470 | Cannabioxepanic acid-C5 (CBXA)*                                                       | C22H22O4 | 349.14453 |
| Miscellaneous   | Dehydrocannabifuran-C5 (DCBF)                                                 | C21H24O2 | 307.17035 | Dehydrocannabifuranic acid-C5 (DCBFA)*                                                | C22H24O4 | 351.16018 |
| CBN             | Cannabinol-C5 (CBN)                                                           | C21H26O2 | 309.18600 | Cannabinolic acid-C5 (CBNA)                                                           | C22H26O4 | 353.17583 |
| CBND            | Cannabinodiol-C5 (CBND)                                                       | C21H26O2 | 309.18600 | Cannabinodiolic acid-C5 (CBNDA)*                                                      | C22H26O4 | 353.17583 |

|                 |                                                                                                             |          |           |                                                                                                                      |          |           |
|-----------------|-------------------------------------------------------------------------------------------------------------|----------|-----------|----------------------------------------------------------------------------------------------------------------------|----------|-----------|
| Miscellaneous   | Cannabifuran-C5 (CBF)                                                                                       | C21H26O2 | 309.18600 | Cannabifuranic acid-C5 (CBFA)*                                                                                       | C22H26O4 | 353.17583 |
| $\Delta^9$ -THC | (-)- $\Delta^9$ - <i>trans</i> -Tetrahydrocannabinol-C5 ( $\Delta^9$ -THC)                                  | C21H30O2 | 313.21730 | (-)- $\Delta^9$ - <i>trans</i> -Tetrahydrocannabinolic acid-C5 ( $\Delta^9$ -THCA)                                   | C22H30O4 | 357.20713 |
| $\Delta^8$ -THC | (-)- $\Delta^8$ - <i>trans</i> -(6aR,10aR)-Tetrahydrocannabinol-C5 ( $\Delta^8$ -THC)                       | C21H30O2 | 313.21730 | (-)- $\Delta^8$ - <i>trans</i> -(6aR,10aR)-Tetrahydrocannabinolic acid-C5 ( $\Delta^8$ -THCA)                        | C22H30O4 | 357.20713 |
| CBC             | ( $\pm$ )-Cannabichromene-C5 (CBC)                                                                          | C21H30O2 | 313.21730 | ( $\pm$ )-Cannabichromenic acid-C5 (CBCA)                                                                            | C22H30O4 | 357.20713 |
| CBD             | (-)-Cannabidiol-C5 (CBD)                                                                                    | C21H30O2 | 313.21730 | Cannabidiolic acid-C5 (CBDA)                                                                                         | C22H30O4 | 357.20713 |
| CBL             | ( $\pm$ )-(1aS,3aR,8bR,8cR)-Cannabicyclol-C5 (CBL)                                                          | C21H30O2 | 313.21730 | ( $\pm$ )-(1aS,3aR,8bR,8cR)-Cannabicyclolic acid-C5 (CBLA)                                                           | C22H30O4 | 357.20713 |
| Miscellaneous   | Cannabicitran-C5 (CBR)                                                                                      | C21H30O2 | 313.21730 | Cannabicitranic acid-C5 (CBRA)*                                                                                      | C22H30O4 | 357.20713 |
| Miscellaneous   | (-)- $\Delta^9$ -(6aS,10aR- <i>cis</i> )-Tetrahydrocannabinol-C5 ((-)- <i>cis</i> - $\Delta^9$ -THC)        | C21H30O2 | 313.21730 | (-)- $\Delta^9$ -(6aS,10aR- <i>cis</i> )-Tetrahydrocannabinolic acid-C5 ((-)- <i>cis</i> - $\Delta^9$ -THCA)*        | C22H30O5 | 357.20713 |
| Miscellaneous   | (-)- $\Delta^7$ - <i>trans</i> -(1R,3R,6R)-Isotetrahydrocannabinol-C5 ( <i>trans</i> -iso- $\Delta^7$ -THC) | C21H30O2 | 313.21730 | (-)- $\Delta^7$ - <i>trans</i> -(1R,3R,6R)-Isotetrahydrocannabinolic acid-C5 ( <i>trans</i> -iso- $\Delta^7$ -THCA)* | C22H30O4 | 357.20713 |
| CBE             | CBE-C4*                                                                                                     | C20H28O3 | 315.19657 | CBEA-C4*                                                                                                             | C21H28O5 | 359.18640 |
| CBG             | Cannabigerol-C5 (CBG)                                                                                       | C21H32O2 | 315.23295 | Cannabigerolic acid-C5 (CBGA)                                                                                        | C22H32O4 | 359.22278 |
| CBT             | Cannabitrinol-C3 (CBTV)                                                                                     | C19H26O4 | 317.17583 | CBTA-C3 (CBTVA)*                                                                                                     | C20H26O6 | 361.16566 |
| CBN             | Cannabinol methyl ether-C5 (CBNM)                                                                           | C22H28O2 | 323.20165 | CBNMA-C5 (CBNMA)*                                                                                                    | C23H28O4 | 367.19148 |
| CBND            | CBNDM-C5*                                                                                                   | C22H28O2 | 323.20165 | CBNDMA-C5 (CBNDMA)*                                                                                                  | C23H28O4 | 367.19148 |
| CBN             | 8-OH-CBN-C5 (OH-CBN)                                                                                        | C21H26O3 | 325.18092 | 8-OH-CBNA-C5 (OH-CBNA)                                                                                               | C22H26O5 | 369.17075 |
| CBND            | OH-CBND-C5 (OH-CBND)*                                                                                       | C21H26O3 | 325.18092 | OH-CBNDA-C5 (OH-CBNDA)*                                                                                              | C22H26O5 | 369.17075 |
| Miscellaneous   | 10-Oxo- $\Delta^{6a(10a)}$ -Tetrahydrocannabinol-C5 (OTHC)                                                  | C21H28O3 | 327.19657 | 10-Oxo- $\Delta^{6a(10a)}$ -Tetrahydrocannabinolic acid-C5 (OTHCA)*                                                  | C22H28O5 | 371.18640 |
| Miscellaneous   | Cannabichromanone D-C5                                                                                      | C21H28O3 | 327.19657 | Cannabichromanonic acid D-C5*                                                                                        | C22H28O5 | 371.18640 |
| Miscellaneous   | Cannabicumaronone-C5 (CBCON-C5)                                                                             | C21H28O3 | 327.19657 | Cannabicumaronic acid-C5 (CBCONA)                                                                                    | C22H28O5 | 371.18640 |
| CBD             | Cannabidiol monomethyl ether-C5 (CBDM)                                                                      | C22H32O2 | 327.23295 | CBDMA-C5 (CBDMA)*                                                                                                    | C23H32O4 | 371.22278 |
| $\Delta^9$ -THC | $\Delta^9$ -THCM-C5*                                                                                        | C22H32O2 | 327.23295 | $\Delta^9$ -THCMA-C5 ( $\Delta^9$ -THCMA)*                                                                           | C23H32O4 | 371.22278 |
| CBC             | ( $\pm$ )-3"-hydroxy- $\Delta^{4''}$ -cannabichromene-C5                                                    | C21H30O3 | 329.21222 | ( $\pm$ )-3"-hydroxy- $\Delta^{4''}$ -cannabichromenic acid-C5*                                                      | C22H30O5 | 373.20205 |

|                 |                                                                                                                    |          |           |                                                                                                                            |          |           |
|-----------------|--------------------------------------------------------------------------------------------------------------------|----------|-----------|----------------------------------------------------------------------------------------------------------------------------|----------|-----------|
| CBE             | (5aS,6S,9R,9aR)-Cannabielsoin-C5 (CBE)                                                                             | C21H30O3 | 329.21222 | (5aS,6S,9R,9aR)-Cannabielsoic acid-C5 (CBEA)                                                                               | C22H30O5 | 373.20205 |
| Miscellaneous   | 2-geranyl-5-hydroxy-3-n-pentyl-1,4-benzoquinone-C5                                                                 | C21H30O3 | 329.21222 | 2-geranyl-5-hydroxy-3-n-pentyl-1,4-benzoquinonic acid-C5*                                                                  | C22H30O5 | 373.20205 |
| $\Delta^9$ -THC | 8 $\alpha$ -Hydroxy- $\Delta^9$ -Tetrahydrocannabinol-C5 (8 $\alpha$ -OH- $\Delta^9$ -THC)                         | C21H30O3 | 329.21222 | 8 $\alpha$ -Hydroxy- $\Delta^9$ -Tetrahydrocannabinolic acid-C5 (8 $\alpha$ -OH- $\Delta^9$ -THCA)*                        | C22H30O5 | 373.20205 |
| $\Delta^9$ -THC | 8 $\beta$ -Hydroxy- $\Delta^9$ -Tetrahydrocannabinol-C5 (8 $\beta$ -OH- $\Delta^9$ -THC)                           | C21H30O3 | 329.21222 | 8 $\beta$ -Hydroxy- $\Delta^9$ -Tetrahydrocannabinolic acid-C5 (8 $\beta$ -OH- $\Delta^9$ -THCA)*                          | C22H30O5 | 373.20205 |
| $\Delta^8$ -THC | 10 $\alpha$ -Hydroxy- $\Delta^8$ -Tetrahydrocannabinol-C5 (10 $\alpha$ -OH- $\Delta^8$ -THC)                       | C21H30O3 | 329.21222 | 10 $\alpha$ -Hydroxy- $\Delta^8$ -Tetrahydrocannabinolic acid-C5 (10 $\alpha$ -OH- $\Delta^8$ -THCA)*                      | C22H30O5 | 373.20205 |
| $\Delta^8$ -THC | 10 $\beta$ -Hydroxy- $\Delta^8$ -Tetrahydrocannabinol-C5 (10 $\beta$ -OH- $\Delta^8$ -THC)                         | C21H30O3 | 329.21222 | 10 $\beta$ -Hydroxy- $\Delta^8$ -Tetrahydrocannabinolic acid-C5 (10 $\beta$ -OH- $\Delta^8$ -THCA)*                        | C22H30O5 | 373.20205 |
| $\Delta^9$ -THC | 10 $\alpha$ -hydroxy- $\Delta^{9,11}$ -hexahydrocannabinol-C5                                                      | C21H30O3 | 329.21222 | 10 $\alpha$ -hydroxy- $\Delta^{9,11}$ -hexahydrocannabinolic acid-C5*                                                      | C22H30O5 | 373.20205 |
| $\Delta^9$ -THC | 9 $\beta$ ,10 $\beta$ -Epoxyhexahydrocannabinol-C5                                                                 | C21H30O3 | 329.21222 | 9 $\beta$ ,10 $\beta$ -Epoxyhexahydrocannabinolic acid-C5*                                                                 | C22H30O5 | 373.20205 |
| CBD             | OH-CBD-C5 (OH-CBD)*                                                                                                | C21H30O3 | 329.21222 | OH-CBDA-C5 (OH-CBDA)*                                                                                                      | C22H30O5 | 373.20205 |
| CBG             | Cannabigerol monomethyl ether-C5 (CBGM)                                                                            | C22H34O2 | 329.24860 | Cannabigerolic acid monomethyl ether-C5 (CBGMA)                                                                            | C23H34O4 | 373.23843 |
| Miscellaneous   | Cannabichromanone-C5                                                                                               | C20H28O4 | 331.19148 | Cannabichromanonic acid-C5*                                                                                                | C21H28O6 | 375.18131 |
| CBT             | CBT-C4*                                                                                                            | C20H28O4 | 331.19148 | CBTA-C4*                                                                                                                   | C21H28O6 | 375.18131 |
| CBG             | ( $\pm$ )-6,7- <i>cis</i> -epoxycannabigerol-C5                                                                    | C21H32O3 | 331.22787 | ( $\pm$ )-6,7- <i>trans</i> -epoxycannabigerolic acid-C5                                                                   | C22H32O5 | 375.21770 |
| CBG             | ( $\pm$ )-6,7- <i>trans</i> -epoxycannabigerol-C5                                                                  | C21H32O3 | 331.22787 | ( $\pm$ )-6,7- <i>cis</i> -epoxycannabigerolic acid-C5                                                                     | C22H32O5 | 375.21770 |
| CBC             | (-)-7-hydroxycannabichromane-C5                                                                                    | C21H32O3 | 331.22787 | (-)-7-hydroxycannabichromanonic acid-C5*                                                                                   | C22H32O5 | 375.21770 |
| CBD             | Cannabimovone-C5                                                                                                   | C21H30O4 | 345.20713 | Cannabimovonic acid-C5*                                                                                                    | C22H30O6 | 389.19696 |
| CBT             | (-)- <i>trans</i> -Cannabitriol-C5 ((-)- <i>trans</i> -CBT)                                                        | C21H30O4 | 345.20713 | (-)- <i>trans</i> -Cannabitriolic acid-C5 ((-)- <i>trans</i> -CBTA)*                                                       | C22H30O6 | 389.19696 |
| CBT             | (+)- <i>trans</i> -Cannabitriol-C5 ((+)- <i>trans</i> -CBT)                                                        | C21H30O4 | 345.20713 | (+)- <i>trans</i> -Cannabitriolic acid-C5 ((+)- <i>trans</i> -CBTA)*                                                       | C22H30O6 | 389.19696 |
| CBT             | ( $\pm$ )- <i>cis</i> -Cannabitriol-C5 (( $\pm$ )- <i>cis</i> -CBT)                                                | C21H30O4 | 345.20713 | ( $\pm$ )- <i>cis</i> -Cannabitriolic acid-C5 (( $\pm$ )- <i>cis</i> -CBTA)*                                               | C22H30O6 | 389.19696 |
| CBT             | (-)- <i>trans</i> -10-Ethoxy-9-hydroxy- $\Delta^{6a(10a)}$ -tetrahydrocannabivarin-C3 [(-)- <i>trans</i> -CBT-OEt] | C21H30O4 | 345.20713 | (-)- <i>trans</i> -10-Ethoxy-9-hydroxy- $\Delta^{6a(10a)}$ -tetrahydrocannabivarinic acid-C3 ((-)- <i>trans</i> -CBT-OEt)* | C22H30O6 | 389.19696 |

|                 |                                                                                                                  |          |           |                                                                                                                           |          |           |
|-----------------|------------------------------------------------------------------------------------------------------------------|----------|-----------|---------------------------------------------------------------------------------------------------------------------------|----------|-----------|
| Miscellaneous   | (-)-(6aR,9S,10S,10aR)-9,10-Dihydroxyhexahydrocannabinol-C5 [(-)-Cannabiripsol] (CBR)                             | C21H32O4 | 347.22278 | (-)-(6aR,9S,10S,10aR)-9,10-Dihydroxyhexahydrocannabinolic acid-C5 [(-)-Cannabiripsolic acid] (CBRA)*                      | C22H32O6 | 391.21261 |
| Miscellaneous   | Cannabichromanone C-C5                                                                                           | C21H28O5 | 359.18640 | Cannabichromanonic acid C-C5*                                                                                             | C22H28O7 | 403.17623 |
| Miscellaneous   | (-)-6a,7,10a-Trihydroxy- $\Delta^9$ -tetrahydrocannabinol-C5 [(-)-Cannabitetrol] (CBTT)                          | C21H30O5 | 361.20205 | (-)-6a,7,10a-Trihydroxy- $\Delta^9$ -tetrahydrocannabinolic acid-C5 ((-)-Cannabitetrol) (CBTTA)*                          | C22H30O7 | 405.19188 |
| Miscellaneous   | Cannabichromanone B-C5                                                                                           | C21H30O5 | 361.20205 | Cannabichromanonic acid B-C5*                                                                                             | C22H30O7 | 405.19188 |
| CBT             | 8,9-Dihydroxy- $\Delta^{6a(10a)}$ -tetrahydrocannabinol-C5 (8,9-Di-OH-CBT)                                       | C21H30O5 | 361.20205 | 8,9-Dihydroxy- $\Delta^{6a(10a)}$ -tetrahydrocannabinolic acid-C5 (8,9-Di-OH-CBT)*                                        | C22H30O7 | 405.19188 |
| CBC             | ( $\pm$ )-4-acetoxycannabichromene-C5                                                                            | C23H32O4 | 371.22278 | ( $\pm$ )-4-acetoxycannabichromenic acid-C5*                                                                              | C24H32O6 | 415.21261 |
| Miscellaneous   | 2-acetoxy-6-geranyl-3-n-pentyl-1,4-benzoquinone-C5                                                               | C23H32O4 | 371.22278 | 2-acetoxy-6-geranyl-3-n-pentyl-1,4-benzoquinonic acid-C5*                                                                 | C24H32O6 | 415.21261 |
| Miscellaneous   | 11-Acetoxy- $\Delta^9$ -Tetrahydrocannabinol-C5 (11-OAc- $\Delta^9$ -THC)*                                       | C23H32O5 | 371.22278 | 11-Acetoxy- $\Delta^9$ -Tetrahydrocannabinolic acid-C5 (11-OAc- $\Delta^9$ -THCA)                                         | C24H32O6 | 415.21261 |
| CBG             | 5-acetyl-4-hydroxycannabigerol-C5                                                                                | C23H34O4 | 373.23843 | 5-acetyl-4-hydroxycannabigerolic acid-C5*                                                                                 | C24H34O6 | 417.22826 |
| CBG             | 4-acetoxy-2-geranyl-5-hydroxy-3-n-pentylphenol-C5                                                                | C23H34O4 | 373.23843 | 4-acetoxy-2-geranyl-5-hydroxy-3-n-pentylphenolic acid-C5*                                                                 | C24H34O6 | 417.22826 |
| CBT             | (-)- <i>trans</i> -10-Ethoxy-9-hydroxy- $\Delta^{6a(10a)}$ -tetrahydrocannabinol-C5 ((-)- <i>trans</i> -CBT-Oet) | C23H34O4 | 373.23843 | (-)- <i>trans</i> -10-Ethoxy-9-hydroxy- $\Delta^{6a(10a)}$ -tetrahydrocannabinolic acid-C5 ((-)- <i>trans</i> -CBTA-Oet)* | C24H34O6 | 417.22826 |
|                 | 4-acetoxy-2-geranyl-5-hydroxy-3-n-propylphenol-C5                                                                | C23H34O4 | 373.23843 | 4-acetoxy-2-geranyl-5-hydroxy-3-n-propylphenolic acid-C5*                                                                 | C24H34O6 | 417.22826 |
| CBG             | sesquicannabigerol-C5 (SesquiCBG)                                                                                | C26H40O2 | 383.29555 | Sesquicannabigerolic acid-C5 (SesquiCBGA)*                                                                                | C27H40O4 | 427.28538 |
| CBD             | carmagerol-C5                                                                                                    | C23H36O6 | 407.24391 | Carmagerolic acid-C5*                                                                                                     | C24H36O8 | 451.23374 |
| CBN             | 4-terpenyl cannabinolate-C5                                                                                      | C32H42O4 | 489.30103 |                                                                                                                           |          |           |
| $\Delta^9$ -THC | $\beta$ -fenchyl- $\Delta^9$ -tetrahydrocannabinolate-C5                                                         | C32H46O4 | 493.33233 |                                                                                                                           |          |           |
| $\Delta^9$ -THC | $\alpha$ -fenchyl- $\Delta^9$ -tetrahydrocannabinolate-C5                                                        | C32H46O4 | 493.33233 |                                                                                                                           |          |           |
| $\Delta^9$ -THC | epi-bornyl- $\Delta^9$ -tetrahydrocannabinolate-C5                                                               | C32H46O4 | 493.33233 |                                                                                                                           |          |           |

|                 |                                                            |          |           |
|-----------------|------------------------------------------------------------|----------|-----------|
| $\Delta^9$ -THC | bornyl- $\Delta^9$ -tetrahydrocannabinolate-C5             | C32H46O4 | 493.33233 |
| $\Delta^9$ -THC | $\alpha$ -terpenyl- $\Delta^9$ -tetrahydrocannabinolate-C5 | C32H46O4 | 493.33233 |
| $\Delta^9$ -THC | 4-terpenyl- $\Delta^9$ -tetrahydrocannabinolate-C5         | C32H46O4 | 493.33233 |

---

\*Additional potential phytocannabinoids that were added to the list according to their biosynthesis and decomposition pathways described in the literature.

**Table S2.** Correlation coefficients ( $R^2$ ), limit of quantification (LOQ) and precision for the type I phytocannabinoids expressed as relative standard deviation (RSD)

| Analyte          | $R^2$  | LOQ<br>[ng/ml] | Concentration <sup>a</sup><br>[%] | Precision          |                    |
|------------------|--------|----------------|-----------------------------------|--------------------|--------------------|
|                  |        |                |                                   | Repeatability      | Reproducibility    |
| $\Delta^9$ -THCA | 0.9976 | 5              | 18.81 <sup>b</sup>                | 13.08 <sup>b</sup> | 10.12 <sup>b</sup> |
| CBDA             | 0.9996 | 1              | 12.01                             | 6.15               | 6.91               |
| $\Delta^9$ -THC  | 0.9979 | 2              | 0.98 <sup>b</sup>                 | 8.17 <sup>b</sup>  | 11.04 <sup>b</sup> |
| CBDVA            | 0.9997 | 0.25           | 0.48                              | 6.89               | 7.90               |
| CBD              | 0.9995 | 1              | 0.41                              | 4.62               | 8.66               |
| CBGA             | 0.9933 | 2.5            | 0.19                              | 5.96               | 6.74               |
| CBG              | 0.9997 | 2              | 0.04                              | 4.84               | 5.57               |
| CBDV             | 0.9996 | 1.25           | 0.03                              | 4.54               | 6.41               |
| CBC              | 0.9991 | 0.25           | 0.03                              | 4.09               | 8.82               |
| $\Delta^9$ -THCV | 0.9999 | 0.25           | 0.02 <sup>b</sup>                 | 9.16 <sup>b</sup>  | 9.81 <sup>b</sup>  |
| CBN              | 0.9997 | 1.25           | 0.01 <sup>b</sup>                 | 8.05 <sup>b</sup>  | 12.25 <sup>b</sup> |
| $\Delta^8$ -THC  | 0.9977 | 1.25           | <LOQ                              | -                  | -                  |
| CBL              | 0.9997 | 1.25           | <LOQ                              | -                  | -                  |

<sup>a</sup> Average concentrations from ethanolic extractions of the same sample (n=5).

<sup>b</sup> Precision values quantified according to a second sample.

**Table S3.** Ranges of absolute phytocannabinoid contents for the 36 *Cannabis* samples

| Phyto. Abbreviation | Phyto. type | Calibration curve used                  | Minimum and maximum concentrations and deviations of the 36 <i>Cannabis</i> samples (Fig. 4) |                                    |                                    |                   |                                    |                                    |
|---------------------|-------------|-----------------------------------------|----------------------------------------------------------------------------------------------|------------------------------------|------------------------------------|-------------------|------------------------------------|------------------------------------|
|                     |             |                                         | Min conc. [% w/w]                                                                            | Min deviation of Min conc. [% w/w] | Max deviation of Min conc. [% w/w] | Max conc. [% w/w] | Min deviation of Max conc. [% w/w] | Max deviation of Max conc. [% w/w] |
| $\Delta^9$ -THCA*   | I           | -                                       | 0.2988                                                                                       | -                                  | -                                  | 19.9701           | -                                  | -                                  |
| $\Delta^9$ -THC*    | I           | -                                       | 0.0152                                                                                       | -                                  | -                                  | 4.2287            | -                                  | -                                  |
| $\Delta^9$ -THCA-C4 | II          | $\Delta^9$ -THCA                        | 0.0009                                                                                       | 0.0004                             | 0.0094                             | 0.1185            | 0.0515                             | 1.2492                             |
| $\Delta^9$ -THC-C4  | II          | avg( $\Delta^9$ -THC, $\Delta^9$ -THCV) | 0.0000                                                                                       | 0.0000                             | 0.0000                             | 0.0107            | 0.0005                             | 0.0121                             |
| $\Delta^9$ -THCVA   | II          | $\Delta^9$ -THCA                        | 0.0021                                                                                       | 0.0009                             | 0.0217                             | 0.4357            | 0.1892                             | 4.5926                             |
| $\Delta^9$ -THCV*   | I           | -                                       | 0.0000                                                                                       | -                                  | -                                  | 0.0220            | -                                  | -                                  |
| $\Delta^9$ -THCOA   | II          | $\Delta^9$ -THCA                        | 0.0000                                                                                       | 0.0000                             | 0.0000                             | 0.0632            | 0.0274                             | 0.6662                             |
| $\Delta^9$ -THCO    | II          | avg( $\Delta^9$ -THC, $\Delta^9$ -THCV) | 0.0000                                                                                       | 0.0000                             | 0.0000                             | 0.0000            | 0.0000                             | 0.0000                             |
| $\Delta^9$ -THCMA   | II          | $\Delta^9$ -THCA                        | 0.0000                                                                                       | 0.0000                             | 0.0000                             | 0.0037            | 0.0016                             | 0.0393                             |
| $\Delta^9$ -THCM    | II          | avg( $\Delta^9$ -THC, $\Delta^9$ -THCV) | 0.0000                                                                                       | 0.0000                             | 0.0000                             | 0.0000            | 0.0000                             | 0.0000                             |
| CBDA*               | I           | -                                       | 0.0308                                                                                       | -                                  | -                                  | 13.4860           | -                                  | -                                  |
| CBD*                | I           | -                                       | 0.0000                                                                                       | -                                  | -                                  | 2.0748            | -                                  | -                                  |
| CBDA-C4             | II          | avg(CBDA,CBDVA)                         | 0.0001                                                                                       | 0.0001                             | 0.0021                             | 0.0779            | 0.0707                             | 1.7171                             |
| CBD-C4              | II          | avg(CBD,CBDV)                           | 0.0000                                                                                       | 0.0000                             | 0.0000                             | 0.0055            | 0.0010                             | 0.0247                             |
| CBDVA*              | I           | -                                       | 0.0001                                                                                       | 0.0001                             | 0.0032                             | 1.0959            | 1.0959                             | 26.6070                            |
| CBDV*               | I           | -                                       | 0.0000                                                                                       | -                                  | -                                  | 0.0742            | -                                  | -                                  |
| CBDOA               | II          | avg(CBDA,CBDVA)                         | 0.0000                                                                                       | 0.0000                             | 0.0000                             | 0.0166            | 0.0151                             | 0.3655                             |
| CBDO                | II          | avg(CBD,CBDV)                           | 0.0000                                                                                       | 0.0000                             | 0.0000                             | 0.0000            | 0.0000                             | 0.0000                             |
| CBDMA               | II          | avg(CBDA,CBDVA)                         | 0.0000                                                                                       | 0.0000                             | 0.0000                             | 0.0091            | 0.0083                             | 0.2015                             |
| CBDM                | II          | avg(CBD,CBDV)                           | 0.0000                                                                                       | 0.0000                             | 0.0000                             | 0.0013            | 0.0003                             | 0.0061                             |
| CBGA*               | I           | -                                       | 0.0510                                                                                       | -                                  | -                                  | 1.9291            | -                                  | -                                  |

|            |    |                                                                        |        |        |        |        |        |        |
|------------|----|------------------------------------------------------------------------|--------|--------|--------|--------|--------|--------|
| CBG*       | I  | -                                                                      | 0.0213 | -      | -      | 0.1730 | -      | -      |
| CBGA-C4    | II | CBGA                                                                   | 0.0000 | 0.0000 | 0.0000 | 0.0031 | 0.0025 | 0.0613 |
| CBG-C4     | II | CBG                                                                    | 0.0000 | 0.0000 | 0.0000 | 0.0002 | 0.0001 | 0.0013 |
| CBGVA      | II | CBGA                                                                   | 0.0000 | 0.0000 | 0.0000 | 0.0239 | 0.0198 | 0.4809 |
| CBGV       | II | CBG                                                                    | 0.0000 | 0.0000 | 0.0000 | 0.0030 | 0.0007 | 0.0176 |
| CBGOA      | II | CBGA                                                                   | 0.0000 | 0.0000 | 0.0000 | 0.0036 | 0.0030 | 0.0721 |
| CBGO       | II | CBG                                                                    | 0.0000 | 0.0000 | 0.0000 | 0.0001 | 0.0000 | 0.0008 |
| CBGMA      | II | CBGA                                                                   | 0.0000 | 0.0000 | 0.0000 | 0.0002 | 0.0002 | 0.0044 |
| CBGM       | II | CBG                                                                    | 0.0000 | 0.0000 | 0.0000 | 0.0002 | 0.0001 | 0.0013 |
| SesquiCBGA | II | CBGA                                                                   | 0.0001 | 0.0001 | 0.0026 | 0.0026 | 0.0022 | 0.0526 |
| SesquiCBG  | II | CBG                                                                    | 0.0022 | 0.0005 | 0.0129 | 0.0273 | 0.0067 | 0.1622 |
| CBCA       | II | CBDA                                                                   | 0.0328 | 0.0268 | 0.6501 | 0.3132 | 0.2553 | 6.1988 |
| CBC*       | I  | -                                                                      | 0.0050 | -      | -      | 0.1096 | -      | -      |
| CBCA-C4    | II | CBDA                                                                   | 0.0000 | 0.0000 | 0.0000 | 0.0033 | 0.0027 | 0.0648 |
| CBC-C4     | II | CBC                                                                    | 0.0000 | 0.0000 | 0.0000 | 0.0007 | 0.0001 | 0.0035 |
| CBCVA      | II | CBDA                                                                   | 0.0004 | 0.0003 | 0.0077 | 0.0651 | 0.0531 | 1.2889 |
| CBCV       | II | CBC                                                                    | 0.0000 | 0.0000 | 0.0000 | 0.0136 | 0.0027 | 0.0647 |
| CBCOA      | II | CBDA                                                                   | 0.0000 | 0.0000 | 0.0000 | 0.0047 | 0.0038 | 0.0929 |
| CBCO       | II | CBC                                                                    | 0.0000 | 0.0000 | 0.0000 | 0.0000 | 0.0000 | 0.0000 |
| CBNA       | II | avg( $\Delta^9$ -THCA,CBDA,CBGA)<br>/avg( $\Delta^9$ -THC,CBD,CBG)*CBN | 0.0002 | 0.0002 | 0.0164 | 0.0809 | 0.0809 | 5.6388 |
| CBN*       | II | -                                                                      | 0.0000 | -      | -      | 0.1502 | -      | -      |
| CBNA-C4    | II | avg( $\Delta^9$ -THCA,CBDA,CBGA)<br>/avg( $\Delta^9$ -THC,CBD,CBG)*CBN | 0.0000 | 0.0000 | 0.0000 | 0.0004 | 0.0004 | 0.0281 |
| CBN-C4     | II | CBN                                                                    | 0.0000 | 0.0000 | 0.0000 | 0.0006 | 0.0004 | 0.0099 |
| CBNVA      | II | avg( $\Delta^9$ -THCA,CBDA,CBGA)<br>/avg( $\Delta^9$ -THC,CBD,CBG)*CBN | 0.0000 | 0.0000 | 0.0000 | 0.0011 | 0.0011 | 0.0736 |
| CBNV       | II | CBN                                                                    | 0.0000 | 0.0000 | 0.0000 | 0.0011 | 0.0008 | 0.0194 |
| CBNOA      | II | avg( $\Delta^9$ -THCA,CBDA,CBGA)<br>/avg( $\Delta^9$ -THC,CBD,CBG)*CBN | 0.0000 | 0.0000 | 0.0000 | 0.0001 | 0.0001 | 0.0101 |

|                  |     |                                                                        |        |        |        |        |        |        |
|------------------|-----|------------------------------------------------------------------------|--------|--------|--------|--------|--------|--------|
| CBNO             | II  | CBN                                                                    | 0.0000 | 0.0000 | 0.0000 | 0.0001 | 0.0000 | 0.0011 |
| OH-CBNA          | II  | avg( $\Delta^9$ -THCA,CBDA,CBGA)<br>/avg( $\Delta^9$ -THC,CBD,CBG)*CBN | 0.0000 | 0.0000 | 0.0000 | 0.0000 | 0.0000 | 0.0000 |
| OH-CBN           | II  | CBN                                                                    | 0.0000 | 0.0000 | 0.0000 | 0.0009 | 0.0006 | 0.0150 |
| CBNM             | II  | CBN                                                                    | 0.0000 | 0.0000 | 0.0000 | 0.0000 | 0.0000 | 0.0000 |
| CBEA             | III | avg(acids)                                                             | 0.0000 | 0.0000 | 0.0000 | 0.0275 | 0.0212 | 0.5141 |
| CBE              | III | avg(neutrals)                                                          | 0.0000 | 0.0000 | 0.0000 | 0.0037 | 0.0009 | 0.0211 |
| CBEVA            | III | avg(acids)                                                             | 0.0000 | 0.0000 | 0.0000 | 0.0009 | 0.0007 | 0.0167 |
| CBEV             | III | avg(neutrals)                                                          | 0.0000 | 0.0000 | 0.0000 | 0.0000 | 0.0000 | 0.0000 |
| CBNDA            | III | avg(acids)                                                             | 0.0000 | 0.0000 | 0.0000 | 0.0054 | 0.0042 | 0.1016 |
| CBND             | III | avg(neutrals)                                                          | 0.0000 | 0.0000 | 0.0000 | 0.0000 | 0.0000 | 0.0000 |
| CBNDVA           | III | avg(acids)                                                             | 0.0000 | 0.0000 | 0.0000 | 0.0002 | 0.0002 | 0.0038 |
| $\Delta 8$ -THC* | I   | $\Delta 8$ -THC                                                        | 0.0000 | -      | -      | 0.0004 | -      | -      |
| CBL*             | I   | CBL                                                                    | 0.0000 | -      | -      | 0.0007 | -      | -      |
| CBTA-1           | III | avg(acids)                                                             | 0.0000 | 0.0000 | 0.0000 | 0.0140 | 0.0107 | 0.2605 |
| CBT-1            | III | avg(neutrals)                                                          | 0.0001 | 0.0000 | 0.0008 | 0.0711 | 0.0165 | 0.4002 |
| CBTV-1           | III | avg(neutrals)                                                          | 0.0000 | 0.0000 | 0.0000 | 0.0005 | 0.0001 | 0.0028 |
| CBTA-3           | III | avg(acids)                                                             | 0.0002 | 0.0002 | 0.0043 | 0.0686 | 0.0528 | 1.2814 |
| CBT-3            | III | avg(neutrals)                                                          | 0.0000 | 0.0000 | 0.0000 | 0.0522 | 0.0121 | 0.2938 |
| CBTV-3           | III | avg(neutrals)                                                          | 0.0000 | 0.0000 | 0.0000 | 0.0000 | 0.0000 | 0.0000 |
| CBT-2            | III | avg(neutrals)                                                          | 0.0000 | 0.0000 | 0.0000 | 0.0104 | 0.0024 | 0.0586 |
| 329-11a          | IV  | avg(neutrals)                                                          | 0.0000 | 0.0000 | 0.0000 | 0.0182 | 0.0042 | 0.1027 |
| 329-11b          | IV  | avg(neutrals)                                                          | 0.0000 | 0.0000 | 0.0000 | 0.0089 | 0.0021 | 0.0499 |
| 329-11c          | IV  | avg(neutrals)                                                          | 0.0000 | 0.0000 | 0.0000 | 0.0151 | 0.0035 | 0.0849 |
| 329-11d          | IV  | avg(neutrals)                                                          | 0.0000 | 0.0000 | 0.0000 | 0.0026 | 0.0006 | 0.0144 |
| 373-12a          | IV  | avg(acids)                                                             | 0.0000 | 0.0000 | 0.0000 | 0.0355 | 0.0273 | 0.6633 |
| 373-12b          | IV  | avg(acids)                                                             | 0.0007 | 0.0005 | 0.0129 | 0.0047 | 0.0036 | 0.0879 |
| 373-12c          | IV  | avg(acids)                                                             | 0.0000 | 0.0000 | 0.0000 | 0.0022 | 0.0017 | 0.0415 |

|         |    |               |        |        |        |        |        |        |
|---------|----|---------------|--------|--------|--------|--------|--------|--------|
| 373-12d | IV | avg(acids)    | 0.0000 | 0.0000 | 0.0000 | 0.0064 | 0.0049 | 0.1192 |
| 327-13a | IV | avg(neutrals) | 0.0000 | 0.0000 | 0.0000 | 0.0006 | 0.0001 | 0.0036 |
| 327-13b | IV | avg(neutrals) | 0.0000 | 0.0000 | 0.0000 | 0.0004 | 0.0001 | 0.0022 |
| 327-13c | IV | avg(neutrals) | 0.0000 | 0.0000 | 0.0000 | 0.0522 | 0.0121 | 0.2936 |
| 371-14a | IV | avg(acids)    | 0.0000 | 0.0000 | 0.0000 | 0.0011 | 0.0009 | 0.0208 |
| 371-14b | IV | avg(acids)    | 0.0000 | 0.0000 | 0.0000 | 0.0086 | 0.0066 | 0.1606 |
| 417-15a | IV | avg(acids)    | 0.0000 | 0.0000 | 0.0000 | 0.0073 | 0.0056 | 0.1371 |
| 373-15b | IV | avg(neutrals) | 0.0000 | 0.0000 | 0.0000 | 0.0045 | 0.0010 | 0.0251 |
| 373-15c | IV | avg(acids)    | 0.0000 | 0.0000 | 0.0000 | 0.1718 | 0.1321 | 3.2081 |
| 357-16a | IV | avg(acids)    | 0.0023 | 0.0018 | 0.0438 | 0.0228 | 0.0175 | 0.4252 |
| 313-16b | IV | avg(neutrals) | 0.0004 | 0.0001 | 0.0022 | 0.0630 | 0.0146 | 0.3546 |
| 361-17a | IV | avg(neutrals) | 0.0000 | 0.0000 | 0.0000 | 0.0205 | 0.0047 | 0.1152 |
| 361-17b | IV | avg(neutrals) | 0.0000 | 0.0000 | 0.0000 | 0.0006 | 0.0001 | 0.0035 |
| 331-18a | IV | avg(neutrals) | 0.0000 | 0.0000 | 0.0000 | 0.1020 | 0.0237 | 0.5745 |
| 331-18b | IV | avg(neutrals) | 0.0275 | 0.0064 | 0.1549 | 0.2615 | 0.0606 | 1.4722 |
| 331-18c | IV | avg(neutrals) | 0.0000 | 0.0000 | 0.0000 | 0.0023 | 0.0005 | 0.0129 |
| 331-18d | IV | avg(neutrals) | 0.0220 | 0.0051 | 0.1239 | 0.1067 | 0.0248 | 0.6009 |
| 375-19a | IV | avg(acids)    | 0.0015 | 0.0012 | 0.0285 | 0.1482 | 0.1140 | 2.7677 |
| 375-19b | IV | avg(acids)    | 0.0000 | 0.0000 | 0.0000 | 0.0018 | 0.0014 | 0.0331 |
| 375-19c | IV | avg(acids)    | 0.0000 | 0.0000 | 0.0000 | 0.0030 | 0.0023 | 0.0559 |

---

\*Analytical standard
